# 1 **Respiratory complex and tissue lineage drive mutational patterns in the tumor**

## 2 **mitochondrial genome**

3

4 Alexander N. Gorelick<sup>1,5</sup>, Minsoo Kim<sup>1</sup>, Walid K. Chatila<sup>1,4,5</sup>, Konnor La<sup>2</sup>, A. Ari Hakimi<sup>3</sup>, Barry S.  
5 Taylor<sup>1,4,5</sup>, Payam A. Gammage<sup>6,7,\*</sup>, Ed Reznik<sup>1,4,\*,†</sup>

6 <sup>1</sup> Computational Oncology Service, Memorial Sloan Kettering Cancer Center

7 <sup>2</sup> Laboratory of Metabolic Regulation and Genetics, Rockefeller University

8 <sup>3</sup> Urology Service, Memorial Sloan Kettering Cancer Center

9 <sup>4</sup> Marie-Josée and Henry R. Kravis Center for Molecular Oncology, Memorial Sloan Kettering Cancer  
10 Center

11 <sup>5</sup> Human Oncology and Pathogenesis Program, Memorial Sloan Kettering Cancer Center

12 <sup>6</sup> CRUK Beatson Institute, Glasgow, UK

13 <sup>7</sup> Institute of Cancer Sciences, University of Glasgow, Glasgow, UK

14 \* Correspondence to: Ed Reznik ([reznike@mskcc.org](mailto:reznike@mskcc.org)) and Payam Gammage  
15 ([payam.gammage@glasgow.ac.uk](mailto:payam.gammage@glasgow.ac.uk))

16 † Lead Contact

17

18

## 19 **Abstract**

20 Mitochondrial DNA (mtDNA) encodes essential protein subunits and translational machinery for  
21 four distinct complexes of oxidative phosphorylation (OXPHOS). Using repurposed whole-  
22 exome sequencing data, we demonstrate that pathogenic mtDNA mutations arise in tumors at a  
23 rate comparable to the most common cancer driver genes. We identify OXPHOS complexes as  
24 critical determinants shaping somatic mtDNA mutation patterns across tumor lineages. Loss-of-  
25 function mutations accumulate at an elevated rate specifically in Complex I, and often arise at  
26 specific homopolymeric hotspots. In contrast, Complex V is depleted of all non-synonymous  
27 mutations, suggesting that mutations directly impacting ATP synthesis are under negative  
28 selection. Both common truncating mutations and rarer missense alleles are associated with a  
29 pan-lineage transcriptional program, even in cancer types where mtDNA mutations are  
30 comparatively rare. Pathogenic mutations of mtDNA are associated with substantial increases in  
31 overall survival of colorectal adenocarcinoma patients, demonstrating a clear functional  
32 relationship between genotype and phenotype. The mitochondrial genome is therefore  
33 frequently and functionally disrupted across many cancers, with significant implications for  
34 patient stratification, prognosis and therapeutic development.

35

36

37

38

## 39 Introduction

40 Somatic mutations are the underlying drivers of malignancy in cancer, and the identification and  
41 characterization of recurrent, functional somatic events has been the capstone goal of cancer  
42 genomics. Genomic searches for recurrent driver mutations have focused on the nuclear exome  
43 or subsets thereof, motivated by the observation that recurrent mutations are concentrated in  
44 the coding regions of a subset of nuclear-DNA-encoded genes. This targeted approach has  
45 powered the discovery of common and rare driver mutations in exonic regions, but by corollary  
46 has also left underexplored the overwhelming majority of the genome and the driver events it  
47 may harbor. Numerous examples now exist of the prevalence and function of oncogenic  
48 mutations beyond the nuclear exome, including mutations to the *TERT* promoter, non-coding  
49 RNAs including ribosomal RNA and snRNAs, and enhancers<sup>1</sup>. A fundamental challenge is  
50 therefore to discover new functional somatic alterations beyond the exome with a fixed and  
51 limited sequencing capacity.

52

53 Somatic mutations in tumors commonly target human mitochondrial DNA (mtDNA)<sup>2-6</sup>, affecting  
54 both the thirteen essential protein components of four distinct complexes (CI, CIII, CIV, and CV)  
55 in oxidative phosphorylation (OXPHOS) as well as the non-coding RNA (22 tRNAs, 2 rRNAs)  
56 necessary for mtDNA translation. (**Fig. 1a**). Despite abundant pharmacological, genetic, and  
57 clinical data demonstrating that perturbation of different OXPHOS complexes (referred to in  
58 shorthand as complexes) produce distinct cellular adaptations<sup>7,8</sup>, the importance of each  
59 complex in shaping mtDNA mutation patterns in cancer is unknown. Because mtDNA is not  
60 commonly targeted by exome sequencing panels, prior analyses of mtDNA mutations have  
61 relied on cohorts profiled with whole genome sequencing, with consequently diminished  
62 statistical power to detect recurrent patterns of mutations relative to exome sequencing studies<sup>8</sup>.  
63 However, due to the extremely high copy number and off-target hybridization rate of mtDNA,  
64 mtDNA reads are abundant in widely-available exome sequencing of tumors<sup>9</sup>. Mitochondrial  
65 DNA therefore represents an opportunity for discovery through repurposing of existing exome  
66 sequencing data.

67

68 Here, by utilizing existing exome sequencing data to more than double statistical power of prior  
69 analyses, we report that OXPHOS complex, in combination with tissue lineage and mutational  
70 consequence, is a critical determinant of mtDNA mutation patterns in cancer. We find that  
71 NADH:ubiquinone oxidoreductase (complex I, CI) mutations are strongly enriched for highly  
72 pathogenic mutations in specific tissue lineages, whereas ATP synthase (complex V, CV) is

73 broadly depleted of all non-synonymous mutations. We further identify six highly recurrent  
74 mtDNA mutation hotspots at specific homopolymer sequence contexts, which collectively  
75 account for over 40% of all truncating mutations to mtDNA, as well as recurrent mutations in  
76 both protein-coding genes and non-coding RNA elements. These mutations produce a defined,  
77 lineage-agnostic transcriptional program and, in specific tumor lineages, associate with both  
78 underlying molecular subtypes and clinical outcomes. Our results argue that specific  
79 components of mitochondrial respiration are broadly perturbed across many tissue lineages,  
80 and that re-analysis of existing genomic data can yield new discoveries in underexplored  
81 genomic terrain.

82

## 83 **Results**

### 84 *mtDNA Mutations in Tumors from Off-target Reads*

85 To study patterns of mtDNA mutations in tumors, we reasoned that the sheer amount of off-  
86 target reads aligning to mtDNA in whole-exome sequencing data would be sufficient to call  
87 somatic mtDNA mutations in a large proportion of samples. We therefore assembled a dataset  
88 of pan-cancer paired tumor and matched-normal exome sequencing samples from the TCGA,  
89  $n=10,132$  (**Supplementary Fig. 1a**). Inconsistent sequencing coverage between samples is an  
90 inherent limitation to this approach, as variants located in regions without adequate sequencing  
91 coverage are not identifiable, and we therefore developed our methodology to be cognizant of  
92 the sequencing coverage at each position in each sample (see **Methods**). We focused our  
93 analysis on regions of mtDNA in protein-coding genes and genes coding for mitochondrial  
94 ribosomal RNAs (rRNAs) and transfer RNAs (tRNAs), excluding the control region (pos 1-576,  
95 16,024-16,569), several known hypervariable loci (pos 302-314; 514-524; 3,106-3,109), and 89  
96 remaining positions not within any genic region from all further analyses (excluded positions  
97 listed in **SI table 1**). The combination of an increase in sample size (in TCGA, relative to whole  
98 genome cohorts) and high off-target read coverage effectively doubled the number of tumor-  
99 associated mtDNA genomes sequenced compared to the largest published dataset of whole-  
100 genome sequenced tumor mitochondrial genomes<sup>3</sup>: On average 6,100 tumors were sequenced  
101 at sufficient depth to call mutations at each mtDNA position (mean $\pm$ -SD: 5,399-6,800 samples  
102 covered at a given position, **Fig. 1b, Supplementary Fig. 1b**), compared to 2,836 whole-  
103 genome tumor sequences from the PCAWG dataset. When further restricted to regions  
104 sequenced at sufficient depth in both tumor and matched-normal samples, each position was  
105 covered in 4,769 tumor/normal pairs on average (mean $\pm$ -SD: 4,148-5,390 samples).

106

107 We implemented a conservative variant calling approach modeled after state-of-the-art  
108 methodologies for exome sequencing, in which we took the intersection of two variant callers  
109 (MuTect2<sup>10</sup> and an in-house variant caller based on the SAMtools mpileup utility<sup>11</sup>, see  
110 **Methods**). Consistent with prior work, mtDNA variants exhibited a strand-specific enrichment  
111 for C>T mutations on the heavy strand and T>C mutations on the light strand (**Supplementary**  
112 **Fig. 1c**). Based on 789 tumor samples from TCGA with whole genome sequences in the  
113 PCAWG cohort<sup>3</sup>, 95.6% of mutation calls from whole exome sequencing validated against  
114 published mutation calls from the PCAWG data (**Fig. 1c**). We also evaluated the possibility that  
115 nuclear-encoded mitochondrial pseudogenes (NUMTs) could corrupt variant calling. Although  
116 both mtDNA and NUMTs are not targeted by exome sequencing, mtDNA is unique in that it  
117 exists at orders of magnitude higher copy number in each cell and, critically, is expressed at  
118 extremely high levels, whereas NUMTs do not show evidence of significant transcription<sup>12</sup>. We  
119 therefore determined the fraction of somatic mtDNA variants from exome sequencing which  
120 could be recapitulated in matched RNA sequencing from the same sample, revealing that  
121 96.9% of such variants were validated. Finally, we observed a strong correlation between DNA  
122 and RNA heteroplasmy overall (Pearson's  $r = 0.918$ ) (**Fig. 1d**), confirming that the vast majority  
123 of observed mutations are expressed and providing further evidence that the mutations called  
124 by our approach are not attributable to NUMTs. In total, we identified 4,381 mtDNA mutations  
125 from 10,132 tumor samples which were either protein-truncating (*i.e.* frame-shift indels or  
126 nonsense mutations); or non-truncating variants (missense, in-frame indels, translation start-  
127 site, non-stop, or mutations to tRNA/rRNAs) which were detected in tumor and absent from  
128 matched-normal samples. Among a subset of 3,264 paired tumor/normal samples with sufficient  
129 coverage to call mtDNA mutations in at least 90% of the mitochondrial genome (32% of  
130 tumor/normal pairs in our dataset overall, referred to throughout as "well-covered" samples),  
131 57% (95%CI 56-59%) had at least one mtDNA variant, in agreement with previous estimates for  
132 mtDNA mutation incidence in pan-cancer sequencing data<sup>2</sup>. Consistent with independent  
133 mutagenic processes operating in the nuclear and mitochondrial genomes, we observed no  
134 correlation between nuclear and mitochondrial mutation burdens pan-cancer or within individual  
135 cancer types (**Fig. 1e, Supplementary Fig. 1d**). Furthermore, in colorectal and stomach  
136 cancers where microsatellite instability (MSI) is common, the presence of MSI affected mutation  
137 burden in the nuclear but not in the mitochondrial genome (**Supplementary Fig. 1e**).

138

139 The mutation rate in the coding region of mtDNA is roughly 67.8 mut/Mb, roughly 6-fold higher  
140 than the rate in 468 cancer-associated genes in the MSK-IMPACT panel<sup>13</sup> of 11.3 mut/Mb ( $P <$

141  $10^{-308}$  (computational limit of detection), two-sided Poisson test). When calculated for each  
142 gene, we also observed mtDNA-encoded genes to have enriched mutation rates compared to  
143 nuclear-DNA-encoded MSK-IMPACT genes ( $P=2 \times 10^{-22}$ , two-sided Wilcoxon rank sum test):  
144 only 2 MSK-IMPACT genes (*TP53*, *KRAS*) exhibited rates higher than that of the most mutated  
145 mtDNA-encoded genes (**Fig. 1f**). Furthermore, the 13 protein-coding mtDNA genes exhibited a  
146 4.2-fold higher rate of truncating variants which disrupt the reading frame (*i.e.* nonsense  
147 mutations and frameshift indels) compared to truncating mutations among 185 known tumor  
148 suppressor genes in the MSK-IMPACT cohort (which also included splice-site variants which  
149 cannot arise in the mitochondrial genome due to the lack of introns) ( $P=9 \times 10^{-5}$ , two-sided  
150 Wilcoxon rank sum test) (**Fig. 1g**), and a 6.7-fold higher rate of non-truncating, non-synonymous  
151 mutations (collectively referred to here as “missense” mutations) than 168 MSK-IMPACT  
152 oncogenes ( $P=6 \times 10^{-9}$ ) (**Fig. 1h**). In total, 11.9% of tumors across all cancers (95% CI: 11.0-  
153 12.9%) harbored a truncating mtDNA variant absent in the patient’s matched normal sample. In  
154 contrast, only 0.15% of normal blood samples exhibited a truncating variant (95% CI: 0.13-  
155 0.17%) based on a recent analysis of ~200,000 mtDNA genomes<sup>14</sup> (**Fig. 1i**). The rate of  
156 truncating mutations in mtDNA genes in tumors therefore represents an 80-fold increase  
157 compared to truncating mutations observed in normal human genomes (**SI table 2.**) Of the 619  
158 truncating mutations we observed, 196 (32%, 95% binomial CI: 28-35%) had >80%  
159 heteroplasmy despite underlying infiltration of the bulk tumor by normal stromal and immune  
160 cells, indicating that a significant number of tumors are dominated by a highly dysfunctional  
161 mitochondrial genotype. Furthermore, high heteroplasmy truncating variants were significantly  
162 more common ( $P=0.01$ , two-sided Fisher’s exact test) under predominantly neutral selection.  
163

164

### 165 *Truncating Mutations Preferentially Target Complex I at Homopolymeric Hotspots*

166 The physiologic response to genetic and pharmacologic inhibition of mitochondrial respiration  
167 depends strongly on which mtDNA-encoded complex (CI, CIII, CIV, CV) is disrupted, implicating  
168 OXPHOS complex as a potential determinant of selective pressure for mutation. We therefore  
169 investigated the somatic mutation rate according to the OXPHOS complex, controlling for the  
170 relative length of mtDNA coding for genes in each complex and uneven coverage within each  
171 sequenced sample. This revealed a striking dichotomy in the relative enrichment of mutations in  
172 each complex. Truncating variants (nonsense mutations and frame-disrupting indels) arose at a  
173 2-fold or greater rate in complex I relative to the other complexes ( $P=0.001$  for least significant  
174 comparison, two-sided Poisson test) (**Fig. 2a**). No difference in mutation rate between

175 complexes was observed for silent mutations, consistent with a lack of differential selective  
176 pressure for synonymous protein changes ( $P=0.5$  for most-significant comparison). Unlike  
177 variants in other complexes, truncating variants in CI demonstrated higher heteroplasmy  
178 (variant allele frequency) than silent variants ( $P=1\times 10^{-6}$ , CI; most significant for other complexes,  
179  $P=0.4$ , two-sided Wilcoxon rank sum test) (**Fig. 2c**). Finally, complex V genes (*MT-ATP6* and  
180 *MT-ATP8*) demonstrated significantly lower rates of truncating but not synonymous mutations.  
181 The findings above were recapitulated in an independent cohort, composed of a distinct mixture  
182 of cancer types, of  $N=1,951$  whole-genome sequenced tumors from the PCAWG dataset, after  
183 excluding samples overlapping with our own cohort (**Fig. 2b**). Tumors of different lineages  
184 exhibited wide variability in the incidence of truncating mutations, with  $\leq 5\%$  of some cancer  
185 types affected by truncating mutations (sarcomas, gliomas), to 20% or greater of other cancer  
186 types (renal cell, colorectal, thyroid) (**Fig. 2d**). In renal, thyroid, and colorectal cancers, the high  
187 burden of truncating variants was driven by a specific enrichment for mutations to complex I (Q-  
188 value  $< 0.01$ , two-sided McNemar's test) (**Fig. 2e**). Truncating variants in these three cancers  
189 affected between 20-30% of all samples, corresponding to a prevalence on the same order or  
190 exceeding that of common tumor suppressors in these diseases. Taken together, these data  
191 indicate that the functional consequence of mtDNA variants and the complex they target are key  
192 determinants of the pattern of somatic mtDNA mutations. Additionally, they suggest that  
193 disruption of complex V, which would fundamentally impair mitochondrial ATP production  
194 independent of the activity of all other OXPHOS complexes, is not tolerated.

195

196 Unexpectedly, we observed that truncating mutations frequently arose at the same genomic  
197 locus, analogous to well-described hotspot mutations that accumulate in nuclear cancer driver  
198 genes and often reflect selective pressure<sup>15,16</sup>. These apparently recurrent alleles were  
199 exclusively indels, rather than nonsense mutations, characterized by a homopolymeric  
200 sequence context. We therefore developed an approach to detecting recurrent mutations at  
201 homopolymeric loci by modeling incidence of frame-shift indels at each locus as a function of  
202 their base-pair length (see **Methods**). Six single-nucleotide repeat loci (out of seventy three loci  
203 of 5 or more base-pairs in length) in *MT-ND1* (c.3,566-3,571,  $n = 32$ ), *MT-ND4* (c.10,947-  
204 10,952,  $n = 25$ ; c.11,032-11,038,  $n = 34$ ; and c.11,867-11,872,  $n = 50$ ), and *MT-ND5* (c.12,385-  
205 12,390,  $n = 23$  and c.12,418-12,425,  $n = 73$ ) accumulated mutations at a rate above null  
206 expectation (Q-value $<0.01$ , **Fig. 2f**). Homopolymer hotspots only arose at single-nucleotide loci  
207 of at least 6 nt in length ( $P=0.0002$ , two-sided Fisher's exact test), were composed of A or C  
208 homopolymer repeats, and exclusively encoded subunits of complex I. Importantly, other

209 homopolymers of equivalent length ( $\geq 6$ ) and nucleotide content exist both in complex I and  
210 complex III/IV/V but did not exhibit recurrent mutations, indicating a high degree of specificity to  
211 hotspot positions (**Fig. 2g**). These six homopolymeric repeat loci collectively accounted for 40%  
212 of all truncating variants observed in our data (95% binomial CI: 36-44%), and 57% (95% CI:  
213 52-62%) of frame-shift indels overall. Notably, recurrent loss-of-function frameshift indels have  
214 been observed at these sites as early driver mutations in rare, often benign renal oncocyomas  
215 <sup>17</sup>; however we observed mutations at these loci to be a pervasive phenomenon across tumor  
216 lineages (**Supplementary Fig. 2a**). Homopolymeric hotspot mutations arose in the PCAWG  
217 cohort (after excluding any samples overlapping with our cohort) at a rate highly consistent with  
218 the TCGA cohort (Pearson's  $r = 0.95$ ), indicating that the indels detected in TCGA at hotspot  
219 loci were not artifacts due to calling variants in microsatellite regions with poor coverage  
220 (**Supplementary Fig. 2b**). Moreover, the three most prevalently mutated of these homopolymer  
221 loci in our dataset (c.11,032-11,038, c.11,867-11,872, c.12,418-12,425) intersected with 100-bp-  
222 long windows enriched for frameshift indels identified in an analysis of 616 pediatric and 2,202  
223 adult tumors (527 of which were from TCGA), highlighting the power of our approach to resolve  
224 focal, recurrent alterations <sup>18</sup>. Although mutations at homopolymeric tracts have not been widely  
225 described in the germline literature, the most recurrent hotspot (*MT-ND5* c.12,418-12,425) has  
226 been previously reported as the site of a germline frame-shift deletion (A12425del) in a pediatric  
227 patient, where the *de novo* heteroplasmic deletion resulted in mitochondrial myopathy and renal  
228 failure<sup>19</sup>.

229

### 230 *Non-synonymous mutations and RNA variants arise as rare recurrent alleles with elevated* 231 *pathogenicity*

232 The bulk of somatic variants we observed in mtDNA were non-truncating, non-synonymous  
233 mutations, including missense mutations, in-frame indels, translation start site mutations and  
234 non-stop mutations (collectively variants of unknown significance or VUS, 73.2% of  $n=4,381$   
235 variants, **Fig. 3a**). Interestingly, non-synonymous variants were again depleted in CV relative to  
236 other complexes, suggesting that CV is intolerant both to truncating variants and to presumably  
237 less-disruptive non-synonymous mutations. Using the APOGEE framework to evaluate the  
238 functional consequence of mutations to protein-coding mtDNA genes <sup>20</sup>, we found that somatic  
239 VUSs were twice as likely to be predicted pathogenic compared to germline polymorphisms  
240 observed among ~200K normal samples from the HelixMTdb dataset (39.5% of somatic-only  
241 variants compared to 20.4% of germline-arising,  $P=6 \times 10^{-14}$ , two-sided Wilcoxon rank sum test,  
242 **Fig. 3b**). Furthermore, when considering all possible mtDNA variants excluding germline

243 polymorphisms (*i.e.* the complete set of all possible somatic variants), VUSs observed in tumors  
244 were more pathogenic than the set of possible somatic variants which never arose in tumors,  
245 suggesting that somatic VUSs are more pathogenic than expected by random chance. We next  
246 evaluated the tendency for VUSs to target specific complexes of the ETC (this necessarily  
247 reduced the types of VUSs to protein-coding variants, including missense, in-frame indels, and  
248 a small number of translation start site and nonstop mutations). In contrast to truncating  
249 variants, protein-coding VUSs were most frequent in CIII ( $P=1 \times 10^{-7}$  for least significant  
250 comparison, two-sided Poisson test, **Fig. 3c**), whose functional integrity as a site for ubiquinol  
251 oxidation has recently been described as essential for tumor cell proliferation<sup>21</sup>, although as with  
252 truncating variants VUSs to CV subunits were still depleted compared to the other complexes  
253 ( $P=0.01$  for least significant comparison). These observations were validated using data from  
254 PCAWG (**Fig. 3d**). Together, these findings suggest that tumors preferentially accumulate  
255 somatic missense mtDNA mutations in a manner dictated by OXPHOS complex, possibly driven  
256 by their capacity to disrupt mitochondrial function due to their elevated pathogenicity.  
257 Furthermore, they support the hypothesis that a purifying selection exists against variants (both  
258 truncating and VUSs) that compromise physiological function of complex V/ATP Synthase.  
259  
260 Single nucleotide variants (SNVs) were far less recurrent than homopolymer indels ( $P=0.01$ ,  
261 two-sided Wilcoxon rank sum test among distinct variants mutated in  $\geq 3$  tumors, **Fig. 3e**).  
262 However, we nevertheless observed a small number of loci with recurrent non-truncating  
263 variants. recurrent mutant loci. We developed a statistical test for recurrence of these loci, and  
264 identified 7 SNV hotspots in the mitochondrial genome ( $Q < 0.01$ , **Fig. 3f**), including 3 in protein-  
265 coding genes (all in complex I), 3 in ribosomal RNAs (all in *MT-RNR2*), and 1 in a tRNA (*MT-*  
266 *TL1*) (**see Methods**). In contrast to the high fraction of truncating mutations which are explained  
267 by a relatively small number of hotspot alleles, hotspot SNV mutations collectively accounted for  
268 1.6% of all VUSs; the vast majority of VUSs were non-recurrent, usually arising in a single  
269 sample. Furthermore, 0/33 mutations arising at the three protein-coding hotspot positions were  
270 nonsense mutations introducing an early stop codon, suggesting either the mutagenic  
271 mechanism generating homopolymeric indel hotspots has a high degree of specificity, or that  
272 truncating hotspots themselves may engender unique phenotypes beyond conventional loss-of-  
273 function.  
274  
275 Mitochondrial tRNAs (mt-tRNAs) are commonly mutated in the context of germline mitochondrial  
276 disease. Interestingly, the somatic hotspot *MT-TL1*<sup>A3243G</sup> (somatically mutated in 6 patients) is



277 also the causative variant of around 80% of MELAS disease cases and approximately 30% of  
278 all mtDNA disease<sup>22,23</sup>. We additionally observed mutations clustered in adjacent positions  
279 3242 ( $n = 5$ ) and 3244 ( $n = 4$ , recently described as a recurrent mutation in Hürthle cell  
280 carcinoma of the thyroid<sup>24</sup>), suggesting that recurrent mutations in *MT-TL1* could affect a  
281 common secondary structure element. Mitochondrial tRNAs adopt a relatively conserved  
282 cloverleaf structure upon folding, and mutations to mt-tRNAs are known to disrupt the function  
283 of specific secondary structure elements. We therefore sought to test whether any positions of  
284 the tRNA cloverleaf structure were enriched for somatic mutations in tumors. We aligned all  
285 tRNA mutations according to their position in the canonical mitochondrial tRNA structure and  
286 developed a statistical approach to identify enrichment in specific secondary structure elements  
287 (see **Methods**). This analysis identified position 31 in the anti-codon stem of the folded tRNA  
288 molecule as a site of recurrent mutation across mt-tRNAs ( $Q=4.7 \times 10^{-4}$ , **Fig. 3g**), which we  
289 further validated using the non-TCGA subset of PCAWG samples ( $Q=0.014$ , **Supplementary**  
290 **Fig. 3a**). Interestingly, position 31 was observed to be mutated at an 8-fold higher rate in tRNAs  
291 encoded on the light-strand (e.g. *MT-TC*,  $n=5$ ; *MT-TP*,  $n=4$ ; *MT-TA*,  $n=3$ ) compared to heavy-  
292 strand-encoded tRNAs ( $P=2 \times 10^{-4}$ , two-sided Fisher's exact test). As a group, mutations at  
293 structural position 31 were predicted to be more pathogenic by MITOTIP relative to mutations at  
294 other tRNA positions (**Fig. 3h**), and in the case of *MT-TA*<sup>T5628C</sup> ( $n=3$ ) are associated with the  
295 mitochondrial disease chronic progressive external ophthalmoplegia (CPEO)<sup>25</sup>. In analogy to  
296 the recurrent mutation of conserved amino acid residues in domains of homologous proteins<sup>26</sup>  
297 or within 3-dimensional regions of folded protein structures<sup>27</sup>, these data suggest that specific  
298 structural features of mt-tRNAs may undergo recurrent mutation and impair normal  
299 mitochondrial physiology.

300  
301 To understand the potential function of rare protein-coding SNV hotspots in mtDNA, we focused  
302 on a recurrent mutation at *MT-ND1*<sup>R25</sup>, which was identified somatically in 11/10,132 TCGA  
303 patients (0.11%), and 5/2,836 PCAWG patients (0.18%). All 16 instances resulted in a  
304 substitution of arginine (R) with glutamine (Q), encoded by a G>A substitution at position 3380.  
305 *MT-ND1*<sup>R25Q</sup> was previously described in a case report as the causative variant in the  
306 development of MELAS in a mitochondrial disease patient<sup>28</sup>, but was never observed among  
307 ~200K normal samples, where the mutant alleles at residue R25 always produced synonymous  
308 mutations (A3381G,  $n=57$ ). Residue R25 is conserved across vertebrates<sup>28</sup>, and is part of a  
309 cluster of charged residues in complex I which form a structural bottleneck in the ubiquinone  
310 binding tunnel leading to the Q binding site<sup>29</sup>. This led us to hypothesize that the R25Q mutation

311 could potentially disrupt the site, impacting ubiquinone : complex I binding kinetics and/or Q-site  
312 substrate specificity, impeding the downstream electron transport chain. We therefore modelled  
313 the effect of *MT-ND1*<sup>R25Q</sup> using a recent, high resolution structure of the mammalian. This  
314 analysis highlighted changes to the local charge environment due to loss of the relatively bulky,  
315 positively charged arginine sidechain. Due to the location of this substitution within the Q  
316 binding tunnel, this is predicted to significantly impact function (**Fig. 3i**). Focusing on colorectal  
317 tumors, which demonstrated the largest numbers of tumors harboring *MT-ND1*<sup>R25Q</sup> ( $n=8$  tumors  
318 total), we examined whether the presence of *MT-ND1*<sup>R25Q</sup> was associated with a particular  
319 transcriptional signature. Relative to mtDNA-wild-type tumors, we observed that *MT-ND1*<sup>R25Q</sup>  
320 tumors were characterized by upregulation of MYC targets and oxidative phosphorylation, and  
321 downregulation of gene signatures associated with hypoxia, IL2/STAT5 signaling, TNF $\alpha$   
322 Signaling via NF $\kappa$ B (**Fig. 3j**). These data suggest that *MT-ND1*<sup>R25Q</sup> promotes a transcriptional  
323 phenotype characterized by increased mitochondrial metabolism and suppressed expression of  
324 innate immune genes.

325

#### 326 *Mitochondrial genotype underlies a lineage-agnostic transcriptional program*

327 Given the lineage specificity underlying both truncating variants and truncating/SNV hotspots,  
328 we studied the overall burden of distinct classes of mtDNA variants (*i.e.* producing a truncating,  
329 missense, synonymous, tRNA or rRNA variant) across cancer types. Restricting our analysis to  
330 well-covered samples including coverage over all homopolymeric hotspots (see **Methods**), we  
331 found that the fraction of mutant samples across cancer types ranged from approximately 23%  
332 of leukemias (95% binomial CI: 13-35%) to as high as 80% of thyroid cancers (95% CI: 63-92%)  
333 (**Fig. 4a**). Moreover, we observed no correlation between the fraction of well-covered samples in  
334 a cancer type and the proportion of samples with a somatic mtDNA mutation (**Supplementary**  
335 **Fig. 4a**), indicating that the highly variable incidence of different somatic variants across cancer  
336 types was not biased by their differing sequencing coverages. This extensive variation suggests  
337 tumor lineages may be subject to different degrees of selection for or against mtDNA mutations,  
338 consistent with the extensive variability of dN/dS ratios previously described in somatic mtDNA  
339 mutations derived from whole genome sequencing of the TCGA<sup>5</sup>.

340

341 Truncating mtDNA mutations approaching homoplasmy (>90% heteroplasmy) were identified in  
342 nearly all cancer types, despite the tendency for stromal and immune cell infiltration to suppress  
343 apparent tumor cell heteroplasmy, suggesting that even cancers in which mtDNA mutations are  
344 uncommon may still contain rare instances of individual tumors with highly mutant mitochondria.

345 In renal and thyroid tumors, truncating mtDNA mutations have historically been associated with  
346 the development of oncocytic neoplasia, whereby tumor cells accumulate dysfunctional  
347 mitochondria<sup>30,31</sup>. That truncating mutations induce a morphologically similar response in two  
348 different tissue lineages suggests that cells may adopt a lineage-agnostic adaptation to the  
349 presence of a truncating mutation. To evaluate if truncating mutations induced functionally  
350 similar consequences across different tumor lineages, we compared the gene expression  
351 profiles of tumor samples with truncating mtDNA variants to tumor samples with wild-type  
352 mtDNA (harboring no nonsynonymous somatic mutations in protein-coding or RNA genes, see  
353 **Methods, Fig. 2f**). In half of all cancer types, tumors harboring truncating mutations exhibited a  
354 conserved expression program characterized by upregulation of genes associated with  
355 oxidative phosphorylation and downregulation of genes associated with TNF $\alpha$  via NF $\kappa$ B  
356 signaling (**Fig. 4b** and **Supplementary Fig. 4b**). Critically, these expression programs were  
357 evident in cancer types such as glioma and mesothelioma, where the proportion of samples with  
358 a truncating variant was comparatively low (**Fig. 4c**). These data suggest that, even in cancer  
359 types where mtDNA mutations are rare, truncating mtDNA mutations produce similar phenotypic  
360 outcomes.

361  
362 Given that the hotspot *MT-ND1*<sup>R25Q</sup> exhibited an expression program resembling truncating  
363 variants, we investigated the generic transcriptional consequences of mtDNA VUSs (see  
364 **Methods**). Compared to truncating variants, fewer genesets demonstrated lineage-agnostic  
365 changes in samples with VUSs. As with truncating variants, the most upregulated geneset in  
366 VUS-harboring tumors was Oxidative Phosphorylation (increased in 5/18 cancer types)  
367 (**Supplementary Fig. 4c**), but the magnitude of this enrichment was attenuated relative to  
368 truncating variants. Notably, several cancer types, such as colorectal cancer, demonstrated a  
369 lineage-specific pattern of gene expression changes, suggesting that mtDNA VUSs are capable  
370 of eliciting a phenotype in specific cancer types.

371  
372 To examine the translational value of mtDNA genotype, we determined the association between  
373 mtDNA mutation status and clinical outcome (overall survival) across cancer types. Using  
374 univariate Cox proportional-hazards regression, for each cancer type we determined the effect  
375 size and significance of both mtDNA truncating variants and VUSs compared to samples with  
376 no somatic mtDNA variants (wild-type). Colorectal cancer demonstrated the largest (by effect-  
377 size) significant association between overall survival time and mtDNA genotype (colorectal  
378 patients with VUSs had a hazard ratio of 0.47 (95%CI 0.03-0.75) compared to those with wild-

379 type mtDNA, Q-value=0.02, Cox proportional-hazards regression) (**Fig. 4d**). Notably, VUSs in  
380 colorectal cancer also associated with a unique transcriptional down-regulation of multiple  
381 genesets including TNF $\alpha$  via NF $\kappa$ B, Hypoxia and Complement (**Supplementary Fig. 4c, Fig.**  
382 **3j**), further suggesting a cryptic phenotype of these variants in affected tumors. We additionally  
383 observed a weak association between mitochondrial genotype and underlying molecular  
384 subtype<sup>32</sup>, with some enrichment of mtDNA mutations in the canonical subtype CMS2 of  
385 colorectal tumors(**Supplementary Figure 4d**). We therefore further evaluated if mtDNA  
386 mutations may be prognostically meaningful in colorectal cancer, using a multivariate analysis to  
387 control for known prognostic clinical and genomic covariates. Among 344 stage 1-3 colorectal  
388 cancer patients, the presence of mtDNA alterations was significantly associated with better  
389 overall survival compared to wild-type samples ( $P=0.002$ , Kaplan–Meier test), with patients  
390 whose tumors harbored VUSs having the best prognosis, and those with truncating variants  
391 having an intermediate improvement (**Fig. 4e**). This association remained significant after  
392 controlling for clinically-relevant prognostic covariates (*i.e.* age, cancer stage, primary site, MSI-  
393 status, consensus molecular subtype and the presence of established nuclear-encoded  
394 genomic driver mutations)<sup>32,33</sup> in a multivariate analysis. VUSs again had a significantly  
395 protective association compared to wild-type (Hazard ratio=0.18, 95% CI: 0.08-0.44; Q-  
396 value=0.001, Cox proportional-hazards model); truncating variants had an intermediate effect  
397 (HR=0.38, 95% CI: 0.15-0.97; Q=0.18) (**Fig. 4f**). These data together suggest that somatic  
398 mtDNA mutations are associated with a clinically and molecularly-distinct class of colorectal  
399 tumors, and that the functional consequence of an mtDNA mutation is a determinant of its  
400 clinical significance.

401

402

## 403 Discussion

404 Although recent evolutionary data suggests that mtDNA mutations may be under positive  
405 selection in cancers of the kidney and thyroid<sup>5</sup>, the broader significance of somatic mtDNA  
406 mutations in cancer remains a point of confusion and debate. Drawing inspiration from analyses  
407 describing hotspots of somatic mutations in the nuclear DNA of tumors, we studied the  
408 recurrence of mutant mtDNA alleles. The discovery that OXPHOS complex shapes mtDNA  
409 mutation patterns in a manner that produces mutation hotspots, in connection with orthogonal  
410 data on the structural consequences, transcriptomic effects and clinical significance of these  
411 alleles in patients with germline mtDNA disease, supports the hypothesis that mitochondrial  
412 respiration is perturbed across many tumors.

413

414 Our results indicate that OXPHOS complex, tissue lineage, and mutation consequence  
415 collectively shape the incidence and putative function of mtDNA mutations. Whereas previous  
416 studies have demonstrated localized regions of mtDNA with elevated somatic mutation rate in  
417 tumors, these works have generally been underpowered to probe phenotypic differences  
418 between alleles. Our data reveal that truncating mutations preferentially impact complex I, and  
419 that non-synonymous mutations of all classes are depleted in complex V. This suggests that  
420 cancer cells can better tolerate, or perhaps even utilize, loss of complex I and the associated  
421 metabolic consequences (e.g. NAD<sup>+</sup>:NADH changes), whereas loss of capacity for ATP  
422 synthesis through complex V mutations appears to be negatively selected against. That CIII  
423 demonstrates elevated rates (relative to other complexes) of missense mutations, but not  
424 truncating mutations, is consistent with its essential role in ubiquinol oxidation and suggests that  
425 weak disruption of CIII is preferential for clonal expansion in tumor cells <sup>21</sup>. Whether truncating  
426 mutations in CIII and CIV promote different phenotypes in cancer cells relative to complex I loss  
427 warrants further investigation.

428

429 There is substantial evidence that in particular subtypes of thyroid and kidney cancer, mtDNA  
430 mutations are the root cause of metabolic adaptations and morphological (oncocyctic) changes  
431 associated with suppression of mitochondrial respiration <sup>34</sup>. What remains unclear is how to  
432 extrapolate the function of truncating mutations in otherwise essential mtDNA genes to cancer  
433 types where oncocyctic tumors are rarely if ever observed but the fraction of samples harboring  
434 these mutations is nevertheless substantial (e.g. colorectal cancers). Critically, our  
435 transcriptional data suggests that, even in cancer types where truncating mtDNA mutations are  
436 rare, they nevertheless promote a transcriptional program characterized by increased  
437 expression of OXPHOS genes and downregulation of innate immune pathways. Because  
438 homoplasmic loss of any gene in the mtDNA necessarily cripples the cell's ability to respire and  
439 disrupts dependent metabolic pathways, these findings suggest that pathogenic and high  
440 heteroplasmy mtDNA mutations potentially render a large fraction of tumors vulnerable to a  
441 metabolic therapeutic intervention.

442

## 443 **Methods**

444

### 445 **Tumor and normal sample sequencing cohorts**

446 Tumor and matched normal sequencing data for TCGA samples were obtained from the GDC  
447 Data Portal (<https://portal.gdc.cancer.gov/>). Briefly, all tumor and matched-normal barcodes  
448 included in the MC3 MAF <sup>35</sup> (<https://gdc.cancer.gov/about-data/publications/pancanatlas>) file  
449 were converted to UUIDs using the TCGAutils R package (v1.9.3), and these UUIDs were  
450 queried for whole-exome sequencing BAM files sliced for chrM using the GDC API. We then  
451 queried the GDC Data Portal for RNA-Sequencing BAM files for TCGA tumors already with  
452 whole-exome sequencing data. This process yielded paired tumor and matched-normal whole-  
453 exome sequencing BAMs for 10,132 TCGA patients, of which 9,455 had additional RNA-  
454 sequencing data. In addition to the raw sequencing data for TCGA samples from which we  
455 called mtDNA mutations (see: Calling mitochondrial variants), we additionally obtained somatic  
456 mitochondrial mutation calls for 2,836 whole-exome sequenced tumors from ICGC/PCAWG <sup>3</sup>, of  
457 which 885 also had TCGA sequencing data. Nuclear somatic mutations for TCGA samples were  
458 obtained from the MC3 MAF, subset for the samples for which mtDNA whole-exome  
459 sequencing BAMs were available. Finally, mtDNA mutation calls for 195,983 normal samples  
460 were obtained from the HelixMTdb cohort of sequenced saliva samples from healthy individuals  
461 <sup>14</sup>.

462

### 463 **Annotating mtDNA regions included in our analysis**

464 Each mitochondrially-encoded gene's name, start/end positions and DNA strand was obtained  
465 from Biomart for human reference genome GRCh38 (release 95). Subsequently, each mtDNA  
466 position (1-16569) was annotated with its associated genetic information. Any mtDNA positions  
467 located at the overlap of two genes were annotated only as associated with whichever gene  
468 started first in numerical genomic position. Variants in non-genic mtDNA regions were excluded  
469 in our analyses. To this end, we excluded any variants in the mtDNA Control Region (positions  
470 1-576, 16,024-16,569) as well as 89 other non-genic positions. We similarly excluded variants in  
471 hypermutated regions of mtDNA, including 302-316, 514-524, and 3,106-3,109). Following  
472 these measures, the genomic length of mtDNA retained in our analyses was 15,354bp. (The  
473 complete list of 16,569 mtDNA positions and their annotated reasons for exclusion is provided in  
474 **SI table 1.**)

475

### 476 **Calling mitochondrial variants**

477 Mutations to the mitochondrial genome were obtained from variants called by both of two  
478 independent variant-calling pipelines. In the first pipeline, Mutect2 (GATK v4.1.2.0) <sup>36</sup> was used  
479 to call variants in chrM in tumor and normal samples individually, the results of which were

480 subsequently intersected to obtain variants called supported in a given patient's tumor and  
481 matched normal samples. Briefly, Mutect2 was run in mitochondrial-mode for each patient's  
482 tumor and normal sample independently against human reference genome GRCh38 (with  
483 minimum base quality-score 20, minimum mapping quality 10, aggressive pcr-indel model, and  
484 other standard quality control arguments for paired-end reads). Artifacts were subsequently  
485 removed using GATK *FilterMutectCalls* (GATK v4.1.2.0)<sup>36</sup>, and multi-allelic sites were split into  
486 individual variants using the *norm* function from bcftools (v1.9)<sup>37</sup>. The resulting tumor and  
487 normal VCF files were then merged using gatk *HaplotypeCaller* (GATK v4.1.2.0)<sup>36</sup>, to annotate  
488 variants in the tumor VCF with their coverage in the normal sample. The resulting VCF was  
489 converted to a MAF file using vcf2maf (v1.6.17, <https://github.com/mskcc/vcf2maf>). Finally,  
490 variants from the generated MAF file were then filtered out unless the variant allele was  
491 supported at least one read in both forward and reverse directions. In the second pipeline,  
492 samtools mpileup (v1.9)<sup>11</sup> was used to generate a pileup file using variant-supporting reads  
493 with minimum mapping quality 20 and base alignment quality 10. Reads failing quality checks or  
494 marked as PCR duplicates were removed. Variants were required to contain at least 2 variant-  
495 supporting reads in the forward and reverse direction. In each pipeline, variants were  
496 additionally filtered to ensure  $\geq 5\%$  variant allele frequency in the tumor, and tumor coverage  $\geq 5$   
497 reads. Variants identified by both pipelines were retained for further analysis. In rare cases,  
498 multiple indels were called in a sample within a homopolymeric region (single-nucleotide  
499 repeats of 5 or more basepairs), with distinct alt-read counts and VAF values, and identical  
500 read-depth values. These multiple indels were collapsed to a single representative indel call.  
501 Briefly, using the Mutect2 variant calls, whichever indel had the highest VAF in the tumor  
502 sample was taken as the representative indel. The count of alt-reads in both tumor and normal  
503 were replaced with their corresponding summed counts across the original multiple indels, and  
504 the VAFs in both tumor and normal were re-calculated from the new summed alt-read counts  
505 divided by the original read-depth. Finally, mutations were classified as of somatic origin  
506 according to the following criteria: Non-truncating variants (that is, all variant classifications  
507 other than nonsense mutations and frame-shift indels) were classified as somatic if the matched  
508 normal sample had a minimum coverage of 5 reads and 0 normal reads called the alternate  
509 allele. Truncating variants in the tumor sample were assumed to be of somatic origin. All other  
510 variants were not classified as somatic and excluded from this study.

511

512 **Nuclear mutational data and annotation**

513 Somatic mutations in nuclear-encoded cancer-associated genes for TCGA samples were  
514 obtained from the PanCanAtlas MC3 MAF file. Mutations in this file were subset for those  
515 among the 468 genes on the MSK-IMPACT clinical sequencing panel<sup>13</sup>. The MAF file was  
516 annotated for known, likely, and predicted oncogenic driver mutations using the MAF-Annotator  
517 tool provided by OncoKB<sup>38</sup> (<https://github.com/oncokb/oncokb-annotator>). Mutations annotated  
518 by OncoKB as “Oncogenic”, “Likely Oncogenic” or “Predicted Oncogenic”, previously  
519 determined cancer hotspot mutations<sup>15,16</sup>, or truncating variants to tumor suppressor genes (*i.e.*  
520 frame-shift indels, splice-site and nonsense mutations) were classified as potential driver  
521 alterations.

522

### 523 **Calculating tumor mutational burden in mtDNA or nuclear DNA**

524 Tumor mutational burden (TMB) was calculated for cohorts of tumors subset for various  
525 genomic regions, including: 1) individual mitochondrial- or nuclear-encoded genes; 2) mtDNA  
526 genes grouped by OXPHOS complex I, III, IV, or V; 3) the entire mitochondrial genome  
527 (excluding non-genic and polymorphic regions); 4) a set of known nuclear-encoded tumor  
528 suppressor genes; and 5) a set of known nuclear-encoded oncogenes. In each case, TMB was  
529 calculated as the total number of somatic mutations among the relevant collection of tumors  
530 divided by the total genomic length sequenced in these tumors (in Mbps). For TMBs calculated  
531 from mutations called in off-target sequencing data (*i.e.* mtDNA variants in TCGA samples), the  
532 total genomic length sequenced was the number of the genomic positions with sufficient  
533 coverage to call somatic variants (5+ read coverage in both tumor and normal sample),  
534 summed across all samples. For TMBs calculated from targeted regions (nuclear DNA; mtDNA  
535 in PCAWG samples), the total genomic length sequenced was the length of the targeted region  
536 (entire gene for mtDNA, exonic regions for nuclear DNA) multiplied by the number of samples.  
537 Error bars for TMBs were calculated as 95% Poisson exact confidence intervals for rates, using  
538 the total number of mutations as the count of events, and the genomic length sequenced in Mb  
539 as the time at risk.

540

### 541 **Identifying hotspot positions for mitochondrial variants**

542 We identified mtDNA positions with statistically recurrent single-nucleotide variants (SNVs) by  
543 comparing the observed proportion of mutations at an individual position (out of the total number  
544 of mutations acquired in its gene) to a rate of mutations at the position expected by chance with  
545 a one-sided binomial test. The probability for SNVs at each position of a gene  $P_{pos, gene}$  was  
546 modeled as a bernoulli trial, where the likelihood of a mutation arising at a given position by its



547 mutability relative to the mutability of all other bases in the gene:  $P_{pos, gene} = \frac{\mu_{pos}}{\mu_{gene}}$ . Consistent  
548 with previous work<sup>15</sup>, we estimated the mutability for each position as a function of its  
549 trinucleotide context. That is, for each position, its mutability  $\mu_{pos}$  was calculated as the count of  
550 SNVs matching the trinucleotide context of the position of interest  $s_{pos}$ , out of the total count of  
551 SNVs anywhere in the mitochondrial genome  $s_{total}$  (after excluding the control region and other  
552 blacklisted regions). Due to the highly strand-specific mutation signatures we observed for  
553 SNVs in mtDNA (**Supplementary Fig. 1c**), we used the complete set of 64 unique  
554 trinucleotides in order to retain this information when calculating the mutability for each position,  
555 rather than collapsing the central nucleotide to C or T resulting in the conventional 32 unique  
556 trinucleotides. As the proportion of patients for which a given position had sequencing coverage  
557 in paired tumor and normal samples linearly affects the likelihood of observing a somatic  
558 mutation at the position, the mutability of a position was adjusted to control for this by  
559 multiplying it by the ratio of the number of samples with paired tumor-normal sequencing  
560 coverage at the position  $C_{pos}$  out of the total number of samples  $N_{samples}$ , so that  $\mu_{pos} =$   
561  $\frac{s_{pos}}{s_{total}} \times \frac{C_{pos}}{N_{samples}}$ . The mutability associated with the gene was calculated as the sum of each  
562 position's trinucleotide mutability. Therefore, for a gene  $L$  basepairs in length:  $\mu_{gene} =$   
563  $\sum_{pos=1}^L \mu_{pos}$ . The final parameter for the binomial test (i.e. the likelihood for a mutation in a gene  
564 to arise at the given position by chance) was therefore  $P_{pos, gene} = \frac{\mu_{pos}}{\mu_{gene}}$ . Each position mutated  
565 in 5 or more samples in each gene was subsequently tested for statistically enriched mutations  
566 by comparing its observed number of mutations out of the total number of mutations in the gene  
567 to this binomial parameter using a right-tailed binomial test. The full list of generated  $P$ -values  
568 across all genes were then corrected for multiple hypothesis testing.

569

## 570 **Homopolymer hotspots for indels**

571 To identify homopolymer regions with statistically enriched rates of insertions and deletions  
572 (indels), we modeled the proportion of samples with indels across all homopolymers as a  
573 function of the homopolymer region's width (i.e. the number of repeated nucleotides, from 5-8).  
574 To this end, all single-nucleotide repeats of 5 or more basepairs were identified in the  
575 mitochondrial reference genome, resulting in N=73 unique homopolymer loci in whitelisted  
576 coding mtDNA. We then modeled the fraction of frame-shift indels across 73 homopolymers  
577 observed to arise at a specific homopolymer locus  $h$  as a binomial process dictated by the  
578 length of the homopolymer  $l_h$  divided by the summed length of all homopolymers, such that the

579 expected likelihood of a frame-shift indel arising at a homopolymer by chance is given by:  $p_h =$   
580  $\frac{l_h}{\sum_{i=1}^{73} l_i l_i}$ . We then tested each homopolymer locus for enriched mutations with a one-sided  
581 binomial test. That is, for each homopolymer locus, the number of bernoulli trials was the  
582 number of samples with complete sequencing coverage for the homopolymer region and two  
583 flanking basepairs; the number of successes was the number of samples with frame-shift indels  
584 at (or immediately adjacent to) the given homopolymer, and the fraction of successful trials was  
585 compared to the expected probability  $p_h$ .

586

### 587 **Hotspot positions in tRNA cloverleaf structure**

588 Positions of the tRNA cloverleaf secondary structure were individually tested for an enriched  
589 rate of SNVs at the equivalent aligned positions of the 22 mitochondrially-encoded tRNAs. A  
590 map of genomic positions in mitochondrial tRNAs to cloverleaf structure positions was provided  
591 by Mitotip<sup>39</sup>

592 ([https://github.com/sonneysa/MitoTIP/blob/master/Output/tRNA%20data%20and%20scoring\\_sc](https://github.com/sonneysa/MitoTIP/blob/master/Output/tRNA%20data%20and%20scoring_scored.xlsx)

593 [ored.xlsx](https://github.com/sonneysa/MitoTIP/blob/master/Output/tRNA%20data%20and%20scoring_scored.xlsx)) and used to assign SNVs at tRNAs to structural positions. Under the null hypothesis  
594 that mutations accumulate at structurally-aligned positions randomly, the proportion of SNVs  
595 aligning to a specific position in the tRNA cloverleaf should be approximately equal to the  
596 number of times the aligned position was sequenced at a sufficient depth in both tumor and  
597 matched normal samples to call somatic mutations, out of the total number of tRNA basepairs  
598 sequenced at sufficient depth across all samples at all structural positions. Therefore for a given  
599 position of the tRNA cloverleaf structure  $p$ , the number of SNVs observed across all tRNAs at  
600 this aligned position  $t_p$  out of  $T$  SNVs across all positions of all tRNAs was tested for enrichment  
601 using a one-sided binomial test, compared to an expected rate equal to the number of tRNA  
602 bases aligned to this position sequenced at sufficient depth  $b_p$  out of  $B$  tRNA bases sequenced  
603 at sufficient depth across all positions of all tRNAs.

604

### 605 **Classifying sample mtDNA variant status**

606 Each tumor sample was classified according to the presence and type of its somatic  
607 mitochondrial variants. Because gaps in sequencing coverage may make existing variants  
608 undetectable and result in the incorrect classification of such samples as “wild-type” for somatic  
609 variants, we only attempted to classify samples with sequencing coverage in both tumor and  
610 matched normal of at least 90% of the included region of mtDNA (referred to as “well-covered”  
611 throughout). Furthermore, given the high incidence of truncating indels we observed at 6

612 hotspot loci, we additionally required that these 6 loci were sequenced at sufficient coverage in  
613 the tumor sample, to ensure that samples potentially harboring recurrent indels would be  
614 excluded and not misclassified. Samples not meeting either of these conditions were classified  
615 as having 'Unknown' mtDNA mutation status. The remaining samples were then classified  
616 according to a decision tree as follows: Samples with any protein-truncating variants were  
617 classified as 'Truncating'; remaining samples still unclassified with multiple mtDNA variants of  
618 different types (among missense, rRNA, and tRNA variants) were classified as '2+ non-  
619 truncating types'; remaining samples with tRNA mutations were classified as 'tRNA'; remaining  
620 samples with rRNA mutations were classified as 'rRNA'; remaining samples with non-truncating,  
621 non-synonymous protein-coding mutations as 'missense'; remaining samples with silent  
622 mutations as 'Silent'; and finally samples still unclassified were classified as 'wild-type'. This  
623 logic prioritizes minimizing annotation bias over conserving sample size, in order to meaningfully  
624 compare the incidence of different variant types across samples. However, in our analysis of the  
625 effect of mtDNA variants on differential gene expression or survival, we modified the logic to  
626 prioritize conservation of sample size. To this end, in RNA-Seq and survival analyses, samples  
627 with any observed truncating variants were classified as truncating, regardless of their  
628 sequencing coverage.

629

### 630 **Testing genesets for transcriptional dysregulation due to mtDNA variants**

631 A matrix of estimated gene expression counts (RSEM values normalized to correct for batch  
632 effects) for TCGA samples was downloaded from the TCGA PanCanAtlas <sup>35</sup> supplemental data  
633 (<http://api.gdc.cancer.gov/data/3586c0da-64d0-4b74-a449-5ff4d9136611>). Gene expression  
634 estimates were rounded to integer values, and subsequently genes with zero estimated counts  
635 in all samples were removed, as were genes with unknown gene symbols. To evaluate  
636 differentially expressed genes between two groups of samples with different mtDNA variant type  
637 (i.e. truncating vs wild-type samples colorectal samples), the rounded gene expression matrix  
638 was subset for the relevant samples and input into the DESeq2 <sup>40</sup> package in R using the  
639 DESeqDataSetFromMatrix utility, along with a table of tumor sample barcodes with their  
640 associated mtDNA classification. Differentially expressed genes were tested and their log-fold  
641 change (LFC) values were shrunken using the apeglm <sup>41</sup> package. *P*-values for all genes tested  
642 were corrected for multiple-hypothesis testing with the Benjamini Hochberg method <sup>42</sup>. The  
643 resulting data from this analysis were used to calculate a statistic for each gene equal to  
644  $\log_{10}(Q\text{-value}) \times \text{sign}(\text{LFC})$ . All genesets from the mSigDB Hallmark geneset collection <sup>43</sup> (v7.1)

645 were then tested for significant up- or down-regulation based on this statistic for each gene  
646 using the fgsea package <sup>44</sup> in R, with a minimum geneset size of 10 genes, a maximum size of  
647 500 genes, and 100,000 permutations.

648

#### 649 **Annotating genomic and clinical covariates in colorectal cancer survival analysis**

650 Clinical data for TCGA colorectal cancer patients including: overall survival time/status, AJCC  
651 pathologic tumor stage, age at diagnosis, sex, and tumor tissue site were obtained from the  
652 TCGA Firehose legacy data on cbiportal  
653 ([https://www.cbiportal.org/study/summary?id=coadread\\_tcga](https://www.cbiportal.org/study/summary?id=coadread_tcga)). Clinical data was subset for  
654 patients with sequencing data in the MC3 MAF. These data were then annotated with MSI  
655 status (MSS, MSI-low, MSI-high) based on published data for patients where this was available  
656 <sup>45</sup>. AJCC Pathologic Tumor Staging data was collapsed into Stages I, II, III, IV, and Stage-IV  
657 patients were excluded. The tumor site was encoded as “Right-colon” if the primary site was:  
658 ascending colon, cecum, hepatic flexure, or transverse colon; or encoded as “Left-colon” for:  
659 descending colon, sigmoid colon, or splenic flexure. Patients with tumor tissue from the rectum  
660 were encoded as “Rectum” for their tumor site. The clinical data for each sample was then  
661 annotated for the presence of known or likely nuclear-encoded driver alterations in  
662 KRAS/HRAS/NRAS, BRAF, APC, SMAD4 and TP53 as based on mutation calls from the TCGA  
663 MC3 MAF <sup>46</sup> (see: Methods “Nuclear mutational data and annotation”). Each patient in the  
664 clinical data was then annotated as having a known/likely driver alteration in each of  
665 KRAS/HRAS/NRAS (grouped into RAS), BRAF, APC, SMAD4 or TP53. The complete multi-  
666 variate model use in the Cox proportional-hazards regression was therefore: Overall Survival ~  
667 mtDNA-status + Age + Stage + Site + RAS + RAF + APC + SMAD4 + TP53 + Sex + MSI-status  
668 + CMS-type.

669

#### 670 **Structural impact of *MT-ND1*<sup>R25Q</sup> variant on complex I**

671 The structural impact of the *MT-ND1*<sup>R25Q</sup> variant was investigated using an electron-microscopy  
672 derived structure of mitochondrial CI in *mus musculus* (PDBID: 6G2J) <sup>29</sup>. The UCSF Chimera  
673 software (v1.13.1) <sup>47</sup> was used to insert the R25Q mutation using the *swapaa* command. The  
674 ubiquinone binding tunnel was predicted using the CAVER Analyst (v2.0b) <sup>48</sup> software run on  
675 the wild-type PDB structure, starting from the side chain oxygen atom in *Ndufs2*<sup>Y108</sup>, and using a  
676 minimum probe radius of 1.4Å as described by the authors <sup>49</sup>. Surface electrostatic charge for  
677 wild-type and mutant structures were determined using the APBS software <sup>50</sup>  
678 (<http://server.poissonboltzmann.org/pdb2pqr>) using default parameters, after subsetting the

679 PDB structure for Mtdn1 (chain H), and converting the resulting PDB file to PQR using  
680 PDB2PQR<sup>51</sup>. All structure visualizations were generated using UCSF Chimera.

681

## 682 **Statistical analyses and figures**

683 All statistical analyses were performed using the R statistical programming environment (version  
684 3.6.1). Protein structure figures were generated using UCSF Chimera, Kaplan-Meier plots and  
685 Cox proportional hazard forest plots were generated with the survminer library in R, ETC  
686 schematic (Fig. 1a) in Adobe Illustrator. All other figures were generated using the ggplot2  
687 library in R. Unless otherwise noted, error bars for proportions are 95% binomial CIs calculated  
688 using the Pearson-Klopper method; error bars for rates (e.g. Mutations/Mb) are 95% Poisson  
689 CIs calculated with the pois.exact function from the epitools library in R. Unless otherwise noted,  
690 *P*-values for difference in proportions were calculated using Fisher's exact tests or two-sample  
691 Z-tests, and for difference in rates using Poisson exact tests. *P*-values were corrected for  
692 multiple comparisons using the Benjamini-Hochberg method<sup>42</sup> and reported as Q-values when  
693 applicable.

694

## 695 **Data and code availability**

696 All relevant data and R code are available on GitHub with instructions to execute the code and  
697 regenerate all figures (<https://github.com/reznik-lab/mtdna-mutations>).

698

## 699 **Acknowledgements**

700 We thank the members of the Reznik and Taylor laboratories for discussion and support. We  
701 also thank Lydia Finley, Kivanc Birsoy, and Nicole Rusk for their feedback.

702

## 703 **Author contributions**

704 ANG, PAG, and ER conceived the study. MK, WKC, KL, AAH, and BST assisted with genomic  
705 data analysis. ANG, PAG, and ER wrote the manuscript with input from all authors.

706

## 707 **Competing financial interests**

708 The authors declare no competing financial interests

709

710

711 **Figures**

712

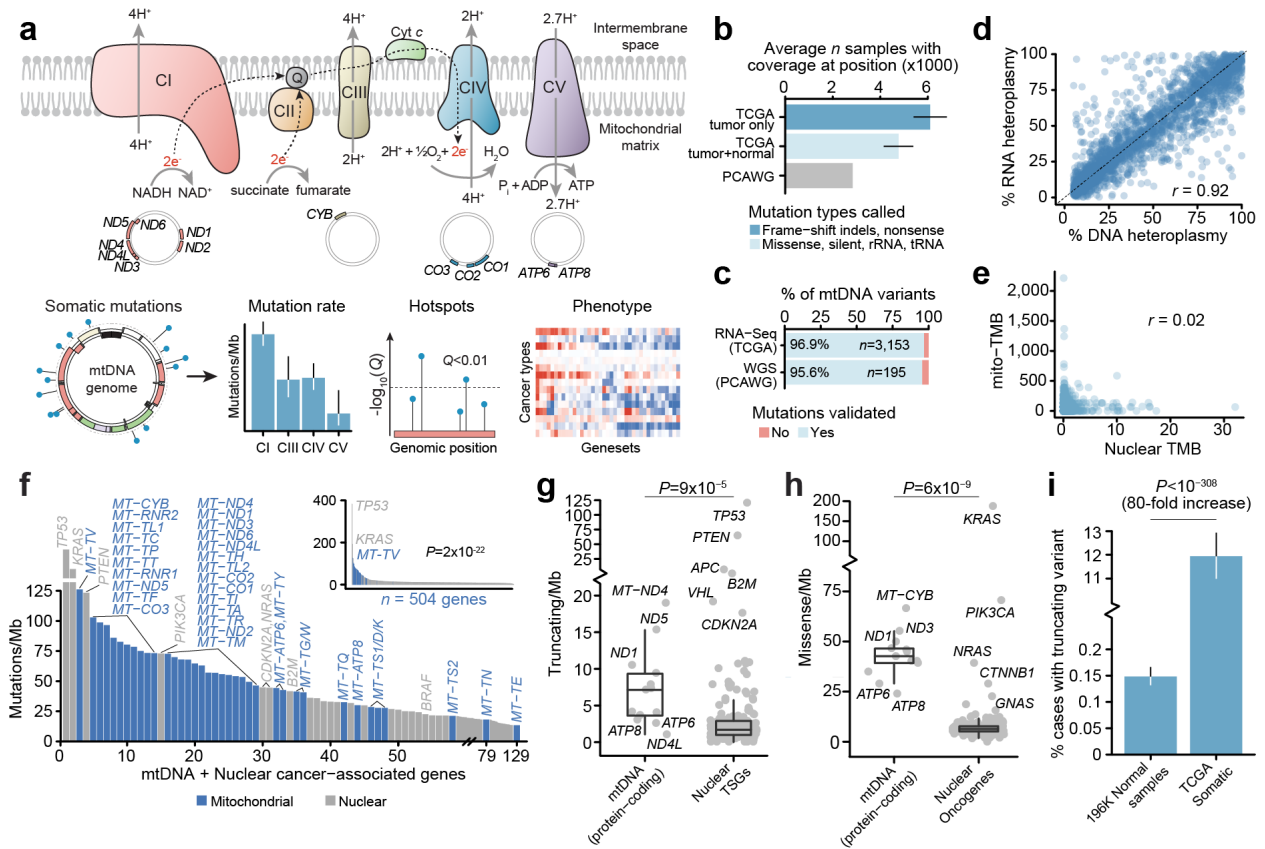

713

714 **Fig. 1: mtDNA mutations are among the most frequent genomic alterations in cancer. a)**

715 Schematic of oxidative phosphorylation (OXPHOS) system and project workflow. Top row,

716 complexes I-IV and their reactions. Center row: mtDNA genomic regions encoding protein

717 subunits of the associated OXPHOS complex. Bottom row, overview of project workflow, in

718 which somatic mutations in mtDNA genes are used to explore inter-complex differences,

719 mutational recurrence and transcriptional phenotype associated with mitochondrial dysfunction.

720 **b)** Average number of tumors with sufficient coverage to call variants at a mtDNA position.

721 Truncating mutations were assumed to be somatic and therefore allowed for tumor-only variant-

722 calling (dark blue), whereas non-truncating (protein-coding non-truncating, tRNA and rRNA

723 mutations) required sufficient coverage in both tumor and matched normal samples (light blue).

724 Gray, the number of whole-genome sequenced (WGS) samples from PCAWG for comparison.

725 **c)** The percentages of variants called from off-target reads which were validated in either RNA-

726 Seq or WGS data from the same tumors. **d)** The correlation between variant heteroplasmy as

727 observed in RNA and DNA-sequencing ( $n=2,575$  mutations with coverage  $\geq 30$  reads in both

728 DNA and RNA). **e)** The correlation between tumor mutation burden (TMB, Mutations/Mb) among

729 mtDNA (Y-axis) and nuclear-encoded cancer-associated genes (referred to simply as cancer  
730 genes) (X-axis),  $n=3,624$  well-covered pan-cancer tumors. **f)** Mutation rates (Mutations/Mb) of  
731 individual mtDNA-encoded genes (blue) and nuclear-encoded cancer-associated genes (gray).  
732 Inset plot: mutation rates among 504 genes with mtDNA genes highlighted. Outer plot: closeup  
733 of the inset plot in the region containing all 37 mtDNA genes; commonly-mutated nuclear cancer  
734 genes in this region are labeled for reference. **g)** Comparison of truncating mutation rates  
735 (truncating variants/Mb) between 13 mtDNA-encoded protein-coding genes and 185 nuclear-  
736 encoded TSGs. **h)** Comparison of non-truncating mutation rate (nonsynonymous, non-  
737 truncating variants/Mb) between 13 mtDNA protein-coding genes and 168 nuclear oncogenes. **i)**  
738 Percentage of patients with truncating mtDNA variants either somatically (in TCGA tumor  
739 samples) or germline (among ~200K normal samples).  
740  
741

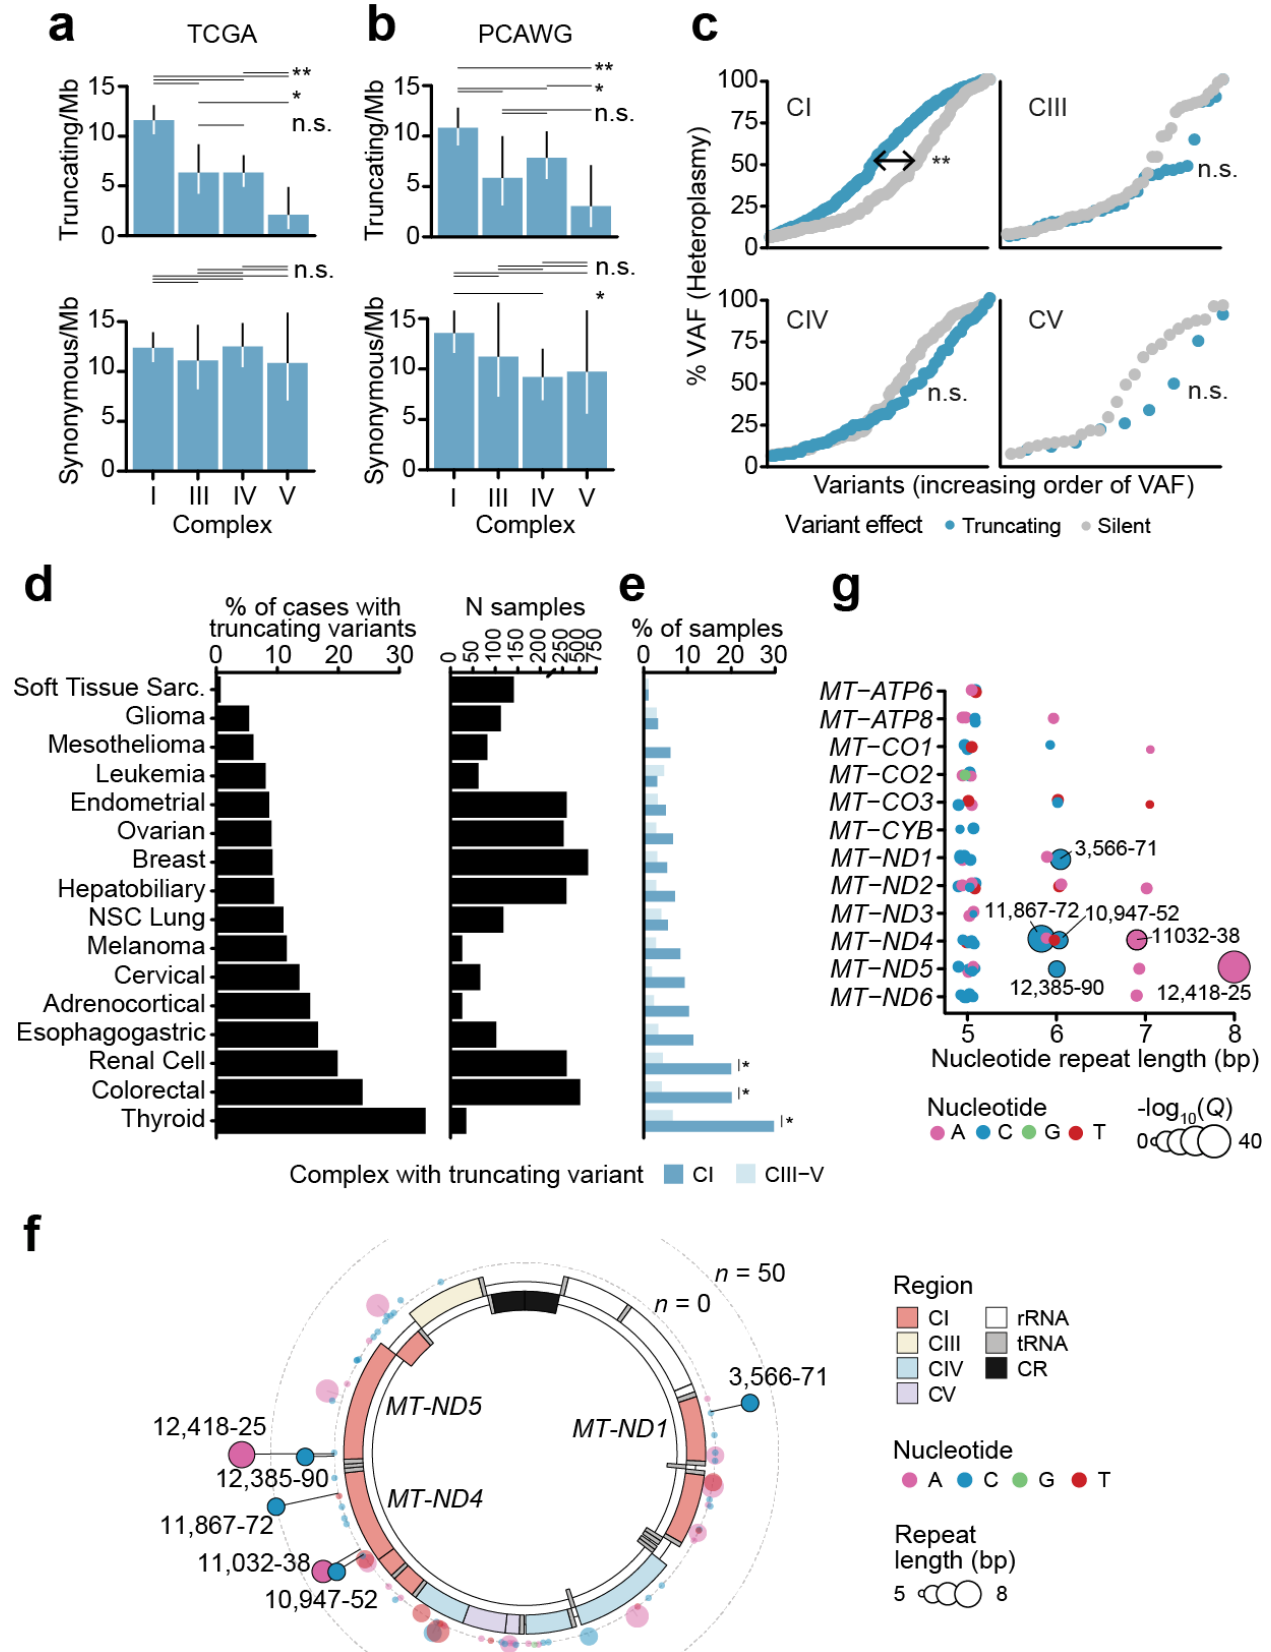



743 **Fig. 2: Truncating variants preferentially target complex I.** **a)** Comparison of truncating  
744 mutation rate (truncating variants/Mb) between OXPHOS complexes I, III, IV, V. Synonymous  
745 mutation rates shown below for comparison. Truncating mutations  $n=352$ ; synonymous  $n=475$ .  
746  $P$ -values from two-sided Poisson-exact. Single asterisk denotes  $P<0.1$ ; double asterisk  $P<0.01$ ;  
747 n.s., not significant. **b)** Validation of analysis in a) using data from  $n=1,951$  whole-genome  
748 sequenced tumors from ICGC/PCAWG after removing samples also in TCGA. Truncating  
749 mutations  $n=198$ ; synonymous  $n=263$ .  $P$ -values and asterisks as in a). **c)** Distributions of  
750 truncating and silent mutation heteroplasmy (estimated by variant allele frequency) among  
751 variants in OXPHOS complex I, III, IV, or V. Difference in heteroplasmy between truncating and  
752 silent mutations calculated by two-sided Wilcoxon rank sum test. CI,  $P=1\times 10^{-6}$ , not significant for  
753 other complexes. **d)** Percentage of tumors with truncating mtDNA variants per cancer type,  
754 among well-covered samples. Right, number of well-covered samples per cancer type. **e)**  
755 Percentage of samples per cancer type with truncating variants affecting OXPHOS complex I or  
756 III-V. Asterisk indicates cancer types with enriched truncating variants targeting CI compared to  
757 CIII-V,  $Q<0.01$ , two-sided McNemar's test. **f)** Circular mtDNA genome annotated with 73  
758 homopolymer repeat loci  $\geq 5$ bp in length. Dot height from the circular mtDNA genome indicates  
759 the number of affected samples, dot color indicates the identity of the repeated nucleotide (A, C,  
760 G, T), dot width indicates the length of the repeat region (5-8bp). Includes putatively somatic  
761 truncating variants with tumor-only sequencing coverage. The 6 solid-color homopolymer loci  
762 highlighted were found to be statistically enriched hotspots for frame-shift indels in tumors. **g)**  
763 The 73 homopolymer repeat loci arranged by gene and repeat size. Dot width indicates –  
764  $\log_{10}(Q\text{-value})$  for enriched frame-shift indels in tumors. The 6 hotspot loci are labeled.  
765

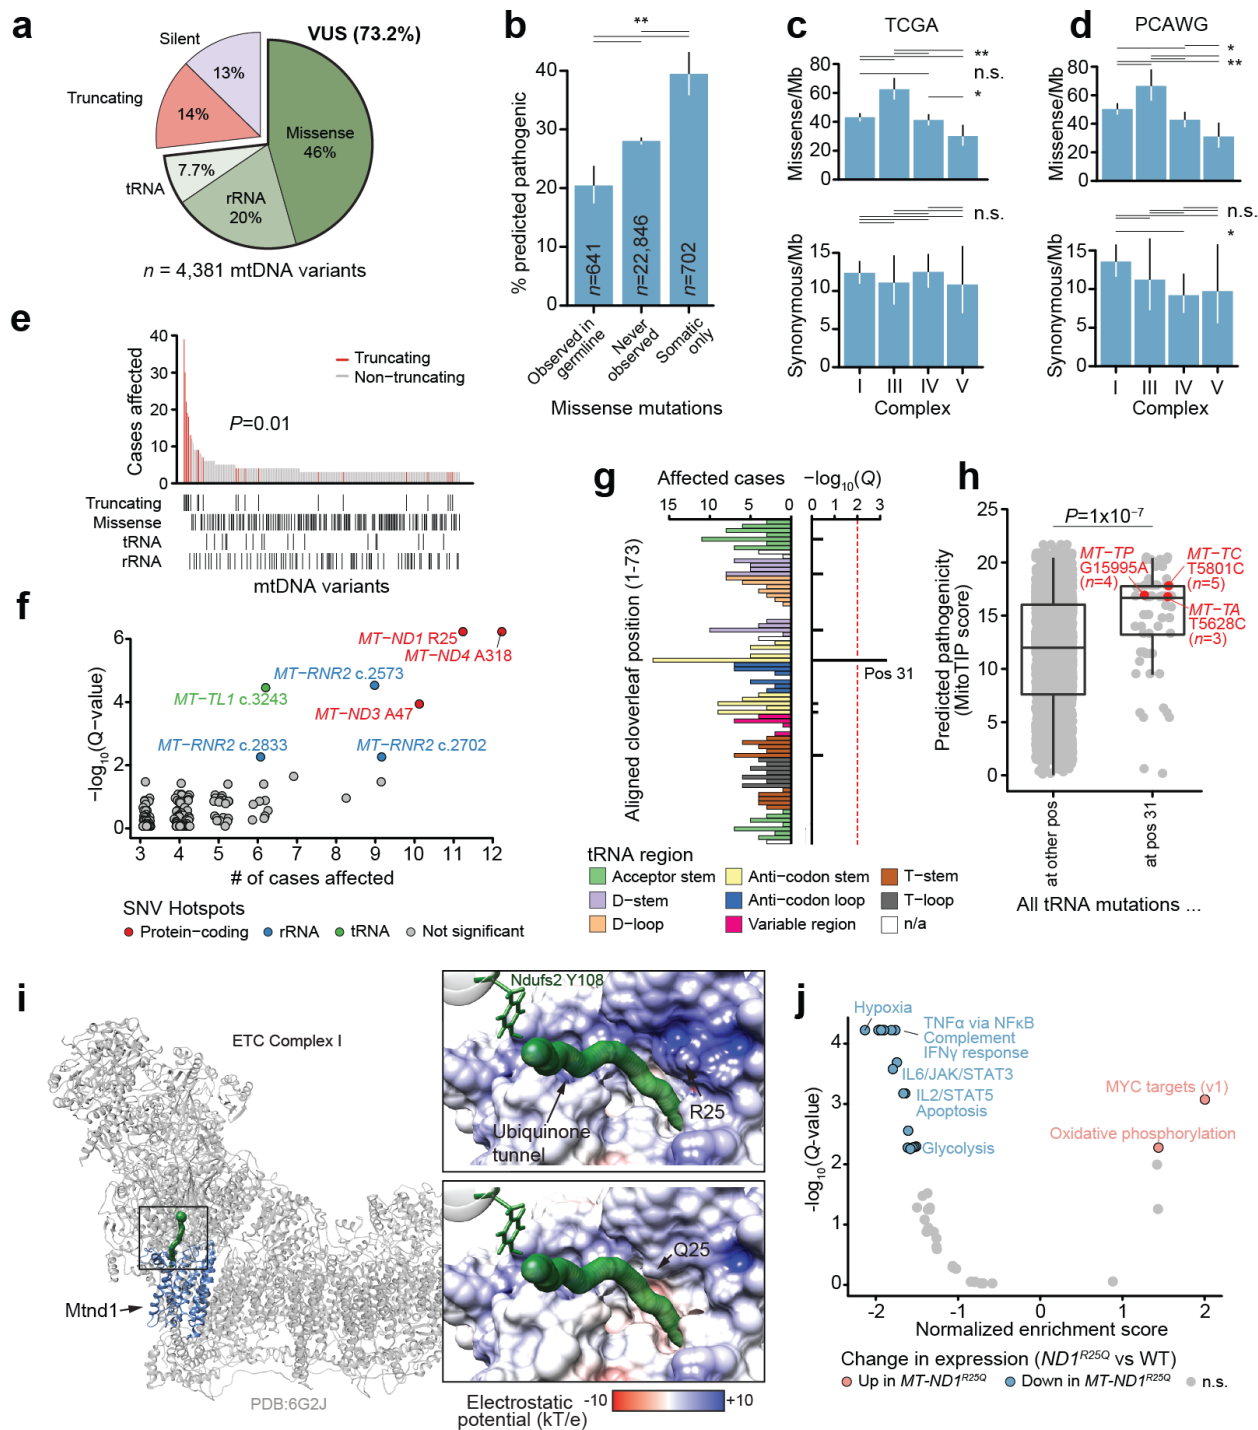

766

767 **Fig. 3: Non-truncating mtDNA mutations arise as rare recurrent alleles in protein-coding**  
 768 **and RNA elements.** **a)** The proportion of truncating, synonymous and VUS somatic mtDNA  
 769 mutations in this study. VUSs are further classified into missense protein-coding variants, or  
 770 mutations to rRNA or tRNA genes. **b)** Comparison of the percentage of unique VUSs predicted  
 771 to be pathogenic by APOGEE<sup>20</sup> between somatic variants which (1) were ever observed to also

772 arise as germline variants among ~200K normal samples from HelixMTdb; (2) were never  
773 observed somatically mutated; or (3) were only observed as somatic mutations. All indicated  
774 comparisons were statistically significant with  $P < 10^{-4}$ . **c)** Comparison of missense mutation rate  
775 (missense variants/Mb) between OXPHOS complexes I, III, IV, V. Synonymous mutation rates  
776 shown below for comparison. Missense mutations  $n=1,718$ ; synonymous  $n=475$ .  $P$ -values from  
777 two-sided Poisson-exact. Single asterisk denotes  $P < 0.1$ ; double asterisk  $P < 0.01$ ; n.s., not  
778 significant. **d)** Validation of analysis in a) using data from  $n=1,951$  whole-genome sequenced  
779 tumors from ICGC/PCAWG after removing samples also in TCGA. Missense mutations  $n=1073$ ;  
780 synonymous  $n=263$ .  $P$ -values and asterisks as in a). **e)** Rare-recurrent alleles are primarily non-  
781 truncating variants. Top portion, number of samples with the given mtDNA mutant allele in  
782 decreasing order of prevalence (mutations called in samples with adequate tumor and normal  
783 coverage). Bottom portion, tracks indicate consequence of corresponding variant in top portion.  
784 **f)** Individual base-pair positions in mtDNA with somatic single-nucleotide variants (SNVs) in  $\geq 5$   
785 tumors, and their statistical enrichment for mutations. Hotspot positions with  $Q < 0.01$  are colored  
786 by the type of gene in which they arise (protein-coding, rRNA or tRNA). Select hotspots are  
787 labeled with their genomic positions (for mutations in tRNAs and rRNAs) or residue (protein  
788 coding genes). **g)** Prevalence of SNVs in tRNA genes, aligned to their positions in the folded  
789 tRNA cloverleaf structure. Bottom portion, number of samples with SNVs at the given tRNA  
790 cloverleaf position across all tRNAs. Top portion, statistical enrichment for the aligned position  
791 for mutations. **h)** Mutations at tRNA cloverleaf structural position 31 have greater predicted  
792 pathogenicity scores (based on MitoTIP<sup>39</sup>) compared to all possible mutations at other  
793 positions. tRNA mutations at position 31 affecting  $\geq 2$  samples are highlighted.  $P$ -value from two-  
794 sided Wilcoxon rank sum test. To reduce image size, a random selection of 5% of the mutations  
795 not at position 31 are plotted ( $P$ -value based on the complete set of mutations). **i)** The Mtnd1  
796 R25Q mutation lies at a critical region of complex I near the entrance to the ubiquinone binding  
797 tunnel (dotted green path), likely affecting its capacity for binding ubiquinone. Larger view: The  
798 complete mammalian complex I structure (gray) highlighting Mtnd1 (blue), and the ubiquinone  
799 binding tunnel (green) and binding site (large green sphere); black box indicates the region in  
800 the closeup view. Closeups, the predicted surface electrostatic potential of Mtnd1 (top) wild-type  
801 and R25Q mutant (bottom), proximal to the ubiquinone binding tunnel (green), leading to its  
802 binding site at Ndufs2 Y108. **j)** Differentially expressed mSigDB Hallmark genesets between  
803 colorectal tumors with *MT-ND1* R25Q and those without non-silent somatic mtDNA variants (*i.e.*  
804 wild-type). Normalized enrichment score (NES) and adjusted  $P$ -values based on gene set  
805 enrichment analysis (GSEA) using the fgsea R package<sup>44</sup>.

806

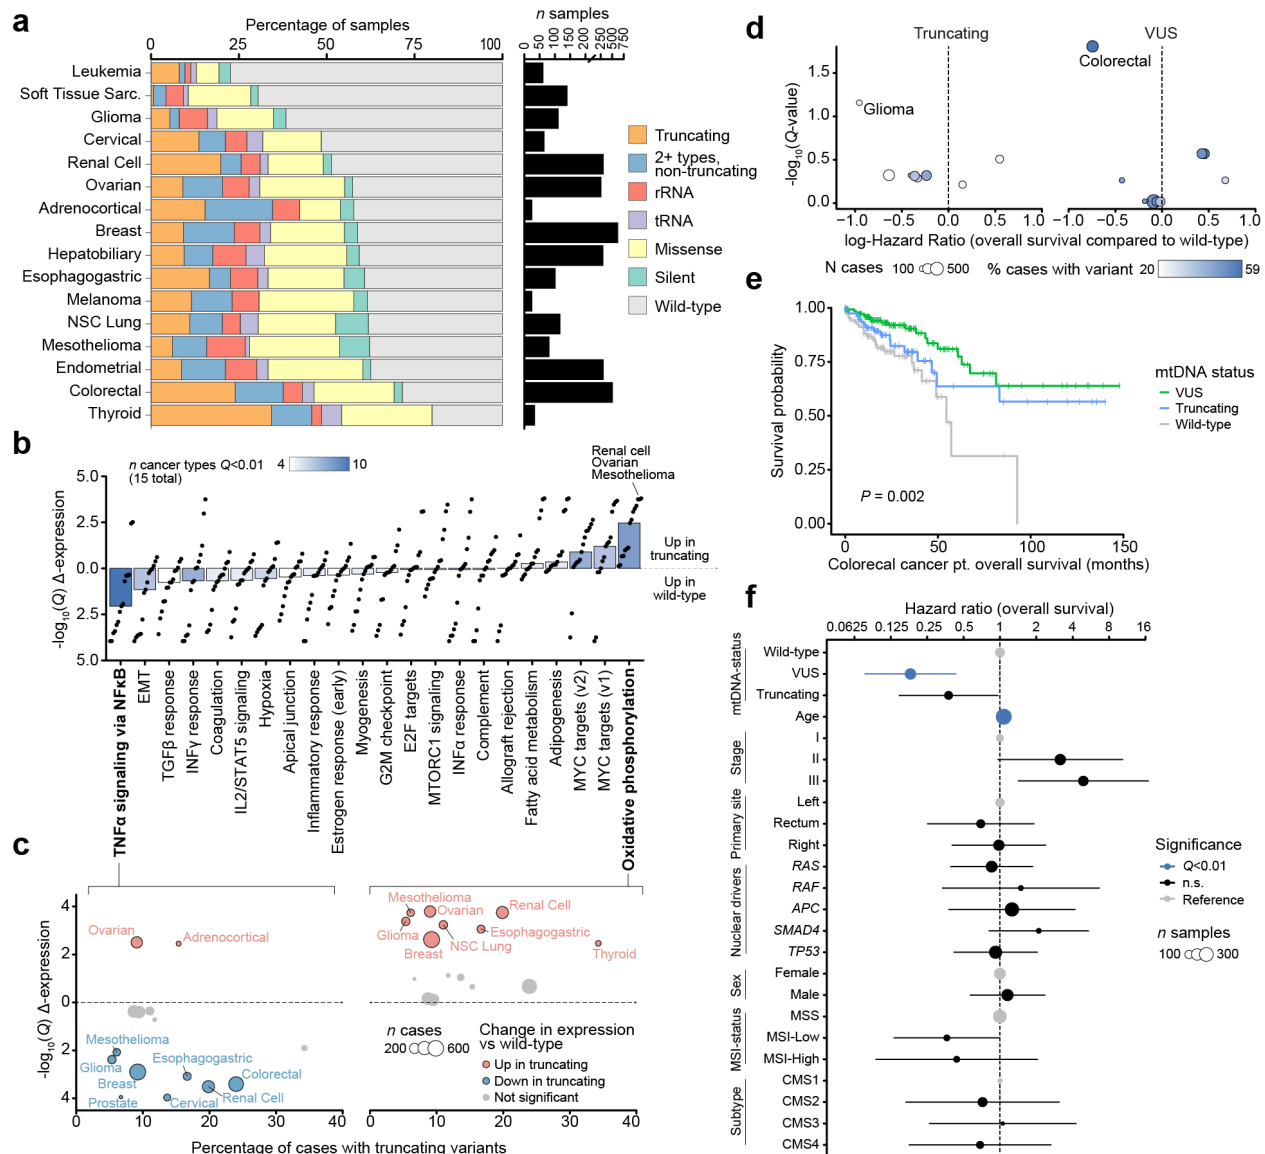

807

808 **Fig. 4: Mitochondrial genotypes associate with transcriptional and clinical phenotypes. a)**

809 Percentage of well-covered tumors with different types of somatic mtDNA variants per cancer

810 type. Right, number of well-covered samples per cancer type. **b)** Differential expression of

811 mSigDB Hallmarks genesets, between samples with truncating mtDNA variants and those with

812 no nonsynonymous somatic mutations (*i.e.* “wild-type” samples). Differential expression is

813 quantified by directional  $-\log_{10}(Q\text{-value})$ : greater than 0 denotes up-regulation in samples with

814 truncating variants, below 0 denotes up-regulation in wild-type samples. Each dot is a single

815 cancer type’s level of dysregulation of that geneset. Bars show the median level of

816 dysregulation across 15 cancer types; bar shading shows the number of cancer types with

817 significant dysregulation ( $Q < 0.01$ ) in either direction. **c)** Differential expression of TNF $\alpha$  via

818 NFKB Signaling (left) and Oxidative Phosphorylation (right) genesets in individual cancer types.  
819 X-axis shows the overall proportion of samples of each cancer type with truncating variants; Y-  
820 axis matches the Y-axis in b). Dot width denotes number of well-covered samples for each  
821 cancer type. **d)** Effect size and statistical significance of mtDNA truncating variants (left) and  
822 VUSs (right) on overall survival among individual cancer types. Effect sizes (quantified as log-  
823 hazard ratios) are from univariate Cox proportional-hazards models run for each cancer type  
824 independently. Q-values are adjusted *P*-values from the model coefficients for each cancer  
825 type.  
826 **e)** Kaplan–Meier plot showing difference in overall survival time among  $n=344$  TCGA colorectal  
827 cancer patients with somatic VUSs ( $n=152$ ), truncating variants ( $n=84$ ), or no nonsynonymous  
828 mutations (*i.e.* wild-type,  $n=108$ ). **f)** Multivariate analysis of the effect of mtDNA variants on  
829 overall survival time among  $n=344$  TCGA colorectal cancer patients (stage 1-3). Truncating  
830 variants and VUSs are each compared to wild-type samples, while controlling for known  
831 prognostic clinical and genomic covariates using a Cox proportional-hazards model. Hazard  
832 ratios for each covariate are shown on a log-scale, error-bars are 95% confidence intervals from  
833 the Cox proportional hazards regression. Point size indicates the number of samples with the  
834 associated covariate value (except for Age, which was coded as a continuous variable, and  
835 therefore the size corresponds to the total number of samples). Blue points are statistically  
836 significant (Q-value < 0.01); black points not significant; gray points are reference categories  
837 and were not tested.

838  
839  
840  
841

## 842 **Supplementary Materials**

843

### 844 **Supplementary Tables**

845

846 **Supplementary Table 1:** Table of mtDNA position 1-16,569 annotated with gene symbols,  
847 encoding strand, nucleotide, and exclusion criteria.

848 **Supplementary Table 2:** Table of mutation rates in mtDNA and nuclear cancer-associated  
849 genes.

850 **Supplementary Table 3:** Table of SNV hotspot positions and associated significance and  
851 annotations.

852 **Supplementary Table 4:** Table of homopolymer indel hotspots and associated significance and  
853 annotations.

854 **Supplementary Table 5:** Table of tRNA structural alignment hotspots and significance and  
855 annotations.

856 **Supplementary Table 6:** Table with mtDNA variants and mtDNA status classifications for all  
857 TCGA samples included in this study.

858

859

## 860 **Supplementary Figures**

861

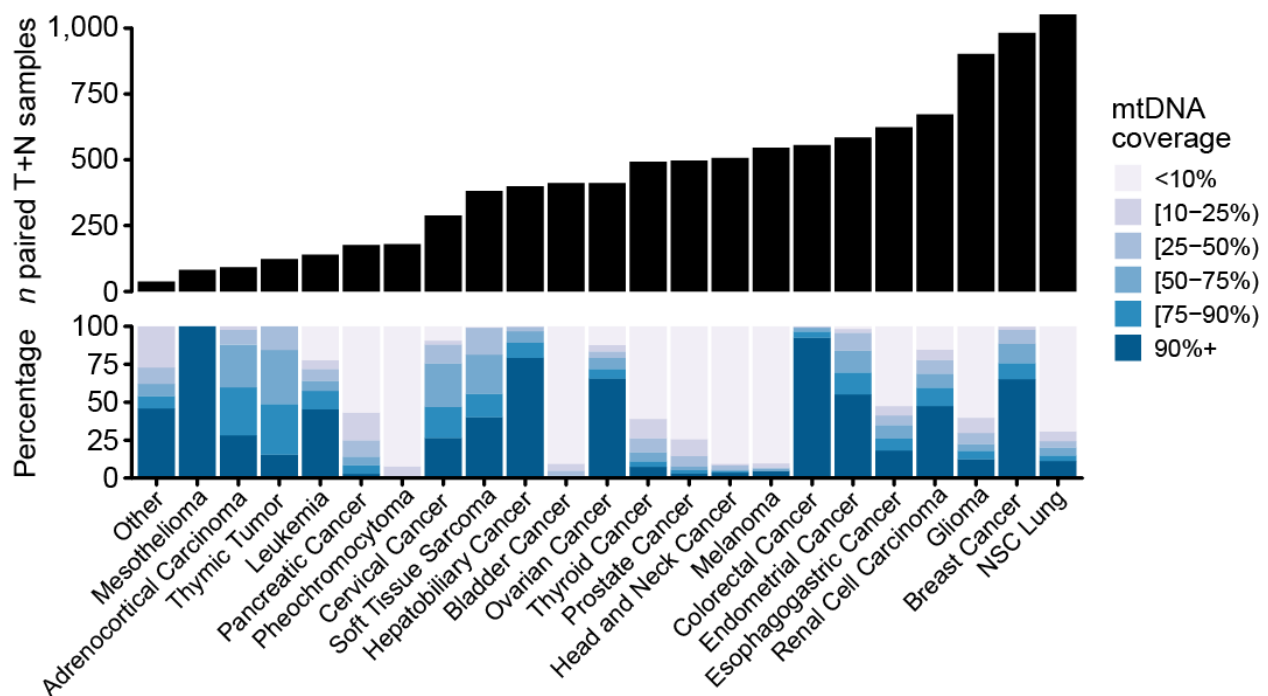

862

863 **Supplementary Fig. 1a: Distribution of cancer types in patient cohort.** Top, number of  
864 tumor samples and paired matched normal samples per cancer type in this study. Bottom, the  
865 proportion of tumor and normal sample pairs each with  $\geq 5$  read coverage in the indicated  
866 percentage of genic regions of the mitochondrial genome (e.g. darkest blue indicates the  
867 percent of well-covered samples of the given cancer type.).

868

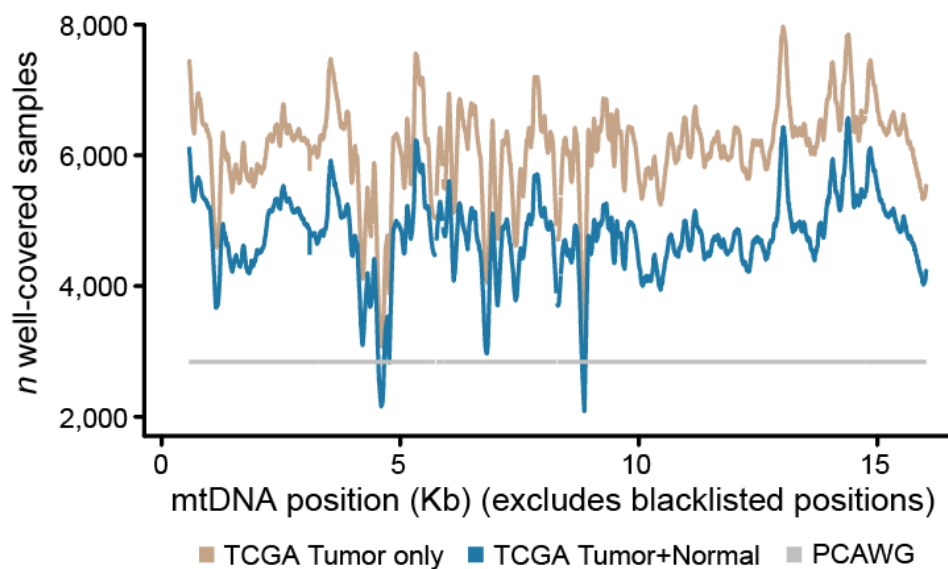

869  
 870 **Supplementary Fig. 1b: mtDNA coverage from off-target reads at each position.** The  
 871 number of samples for which the given mtDNA position was sequenced to adequate depth to  
 872 call somatic variants. Brown, the number of samples using unpaired tumor-only data, applicable  
 873 only for protein-truncating variants which were always assumed to be of somatic origin. Blue,  
 874 the number using paired tumor and matched-normal data, applicable for all non-truncating  
 875 variants which required evidence that the variant was absent in the matched normal to be  
 876 confidently classified as of somatic origin. Gray, the number of whole-genome sequenced  
 877 samples available from ICGC/PCAWG for comparison.

878  
 879  
 880

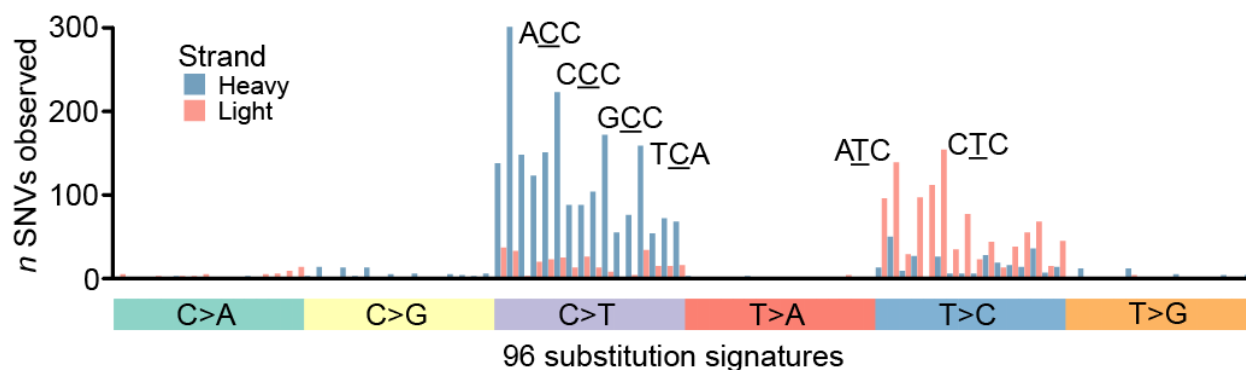

881  
 882 **Supplementary Fig. 1c: Strand-specific mutational signatures in our dataset.** The  
 883 frequency of somatic SNVs on the light or heavy mtDNA strand with each of the 96 possible  
 884 mutational signatures with trinucleotide contexts (among  $n = 3,872$  SNVs). Blue bars indicate  
 885 the prevalence of mutational signatures for heavy-strand encoded SNVs (substitutions at C or T

886 central nucleotides); red bars indicate those for light-strand encoded SNVs (substitutions at G or  
887 T nucleotides, which were standardized to their C or T complementary nucleotide). The most  
888 prevalent mutational signatures are labeled. The underlined central position is mutated with the  
889 single nucleotide substitution labeled in the tile below.

890

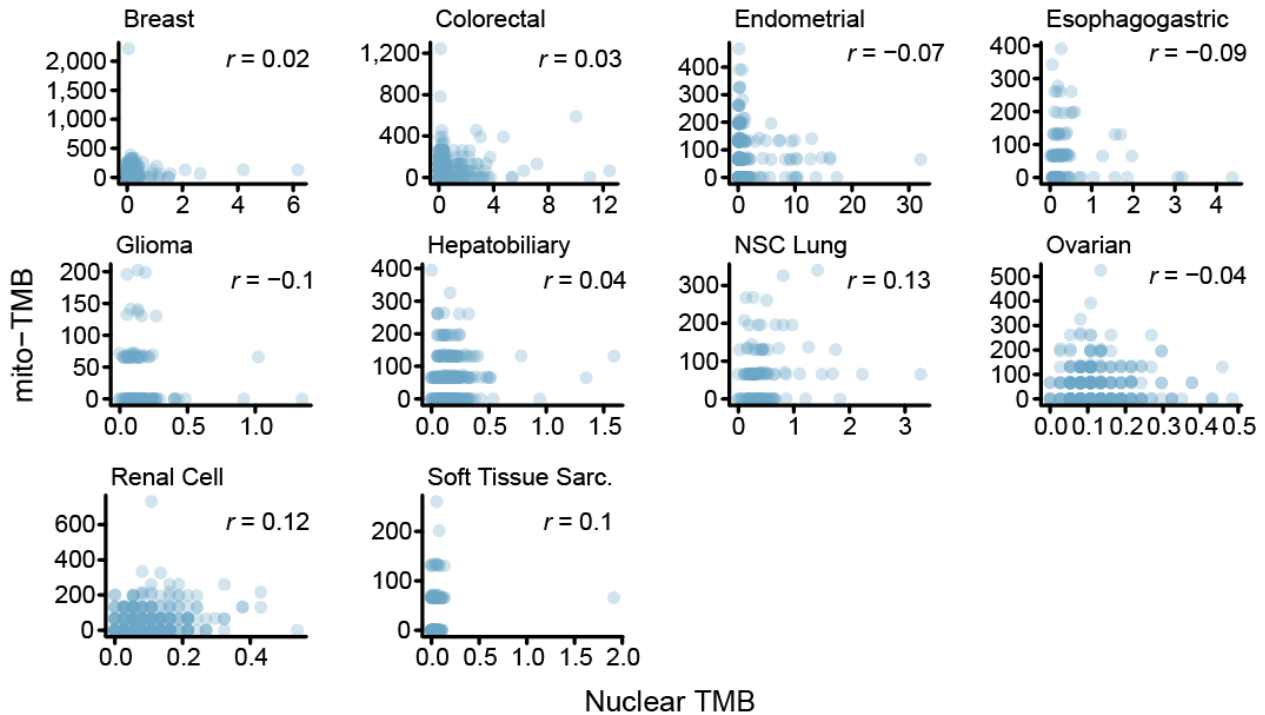



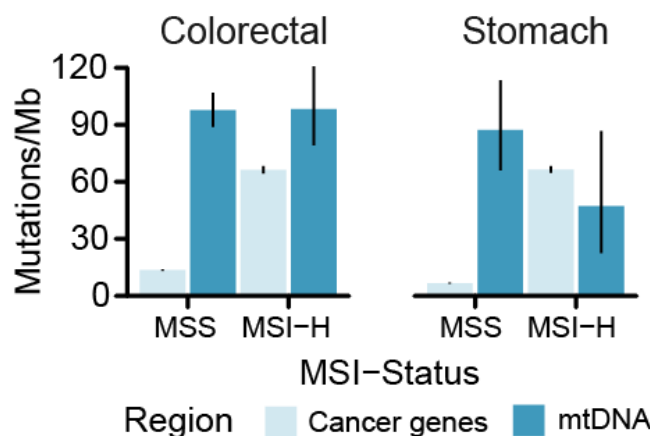

900  
 901 **Supplementary Fig. 1e: Microsatellite instability does not affect somatic mtDNA mutation**  
 902 **rate.** TMBs for somatic mtDNA mutations and mutations to cancer-associated genes are  
 903 compared between microsatellite stable (MSS) and microsatellite unstable (MSI-High) tumors,  
 904 for both ( $n$  colorectal cancer: MSI=65, MSS=318;  $n$  stomach adenocarcinomas: MSI=75,  
 905 MSS=256). Although MSI-High tumors have elevated TMB for nuclear cancer genes, there is no  
 906 effect on mtDNA TMB. Moreover, mtDNA TMB is similar to (or exceeds) that of nuclear cancer  
 907 associated genes in both cancer types. Error bars are 95% Poisson exact confidence intervals.  
 908

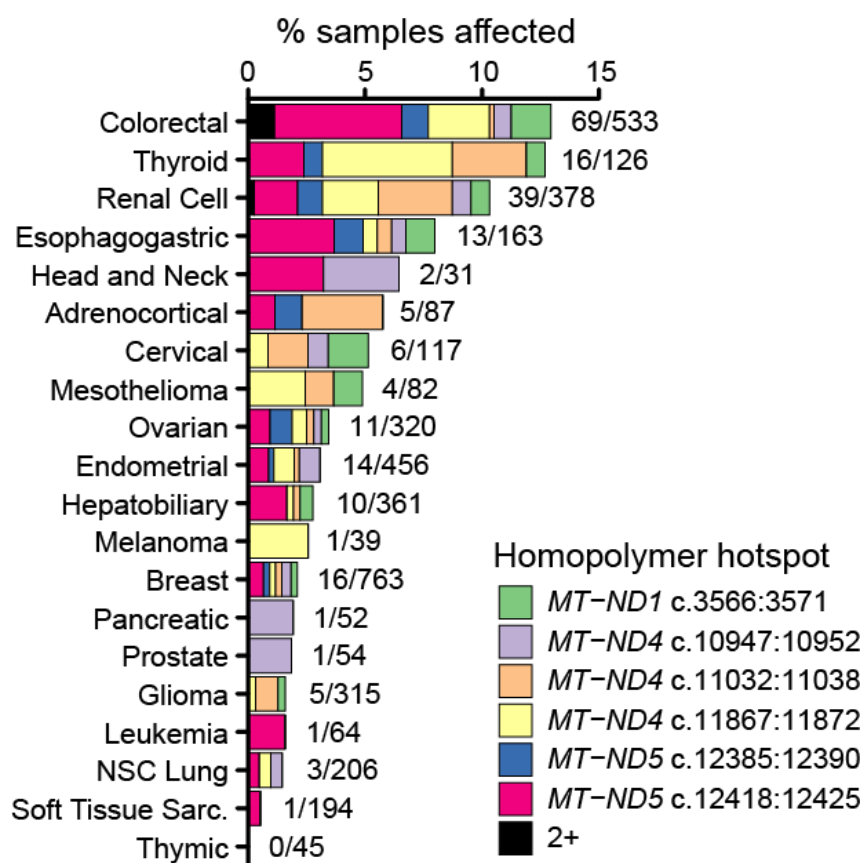

909

910 **Supplementary Fig. 2a: Prevalence of frame-shift indels at homopolymer hotspots across**  
911 **cancer types.** Percentage of cases per cancer type with truncating frame-shift indels at any of 6  
912 indel hotspot loci. Plotted cancer types had  $\geq 20$  well-covered samples ( $n=4,432$  paired tumor  
913 and matched-normal samples total). Labels indicate the fraction of samples with any indels at  
914 homopolymer hotspot out of the total number of well-covered samples for the given cancer type.  
915  
916

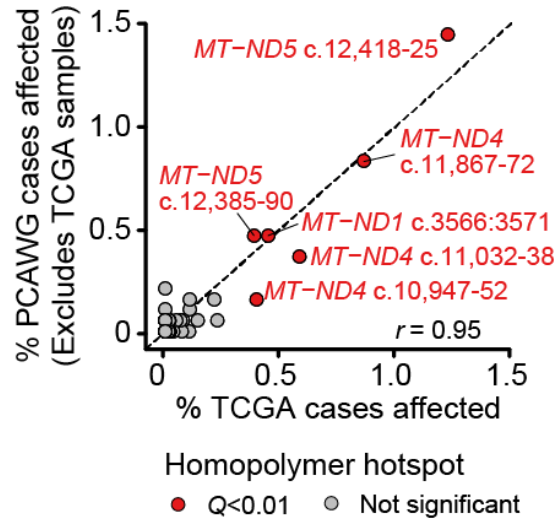

917  
918 **Supplementary Fig. 2b: Validation of homopolymeric indel hotspot loci.** The proportion of  
919 samples in TCGA (X-axis) or PCAWG (excluding samples also in TCGA, Y-axis) with frame-  
920 shift indels at 73 homopolymeric regions. The 6 indel hotspot loci are colored red and labeled.  
921  $y=x$  is shown as a dashed line. Pearson correlation coefficient  $r$  as indicated.  
922

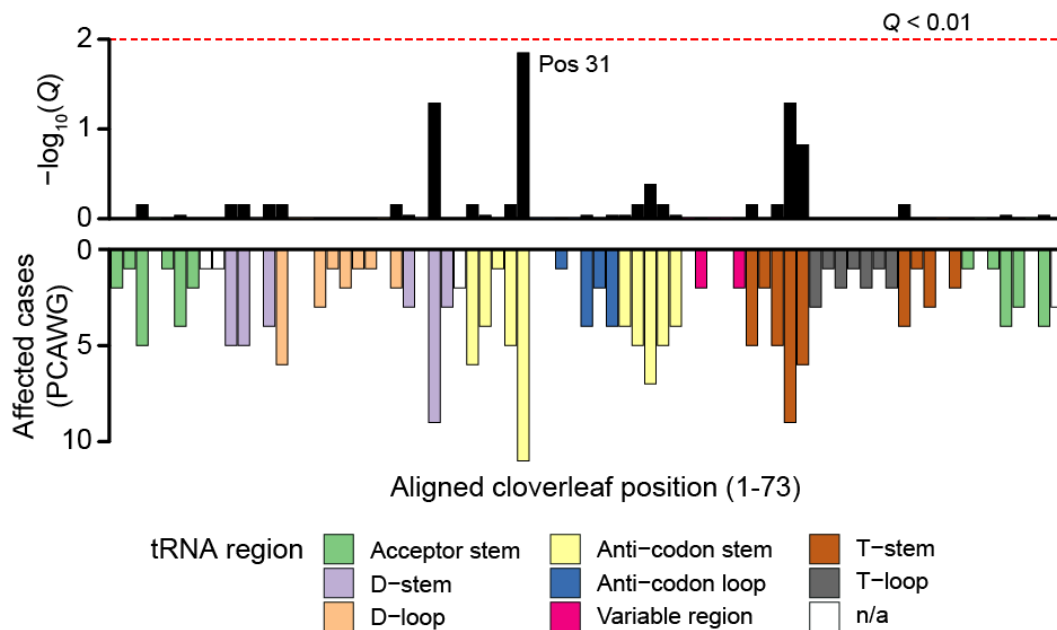

923

924 **Supplementary Fig. 3c: Validation of tRNA structural hotspots in PCAWG.** The number of  
 925 samples with SNVs in tRNAs at the indicated cloverleaf structural position, bottom; top, the  
 926 statistical enriched of the given position for mutations. Position 31 Q-value=0.014,  $n=196$  tRNA  
 927 mutations among 1,951 PCAWG samples.

928

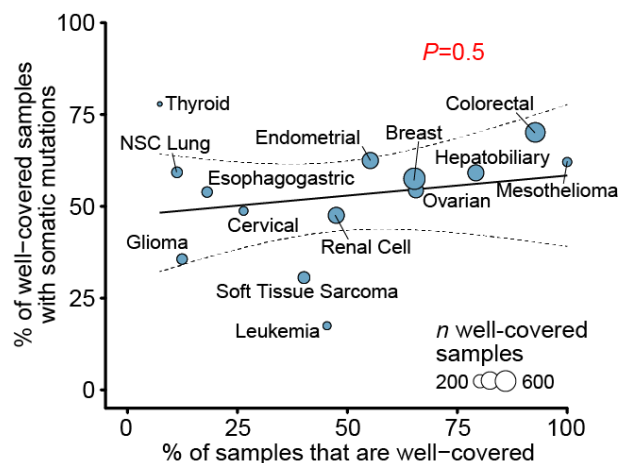

929

930 **Supplementary Fig. 4a: Proportion of samples with detectable mutations is not biased by**  
 931 **cancer type sequencing coverage.** There is no correlation between the fraction of well-  
 932 covered samples in a cancer type and the proportion of well-covered samples with a detectable  
 933 somatic mtDNA mutation. Cancer types with  $\geq 30$  well-covered samples shown,  $P$  value from  
 934 linear regression.

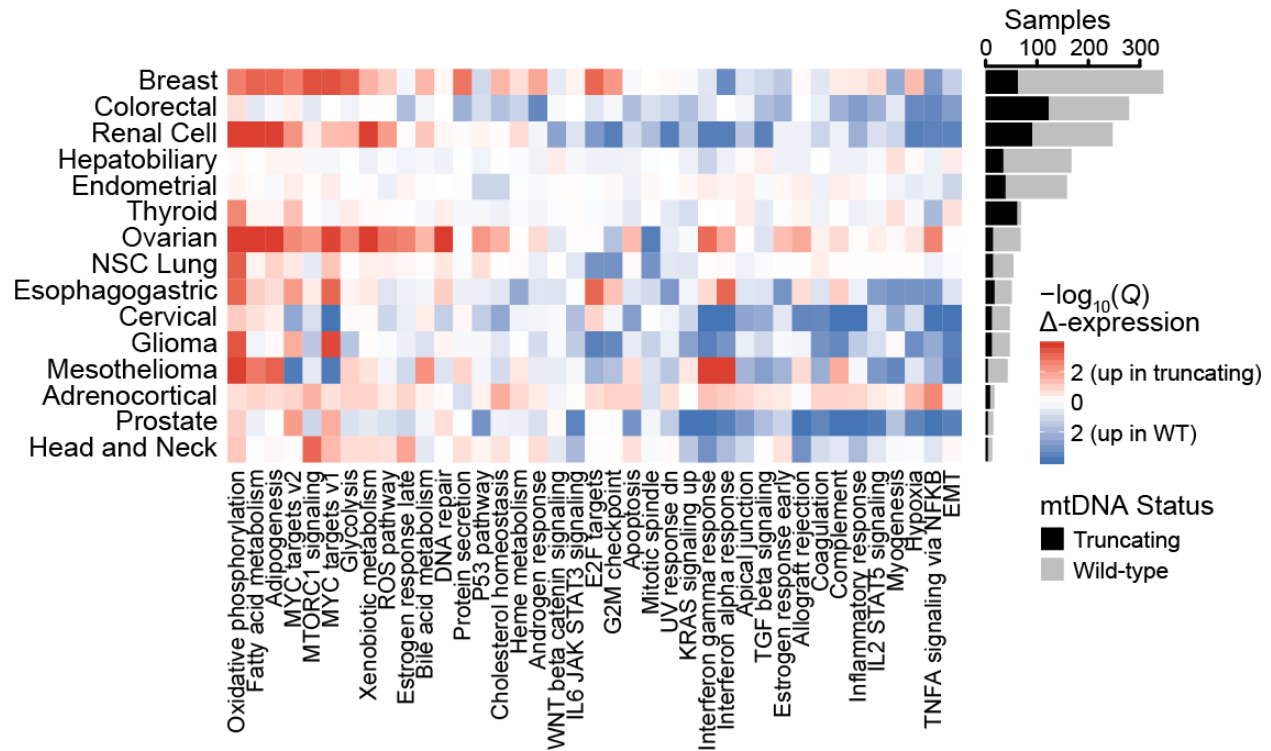

935

936 **Supplementary Fig. 4b: Transcriptional dysregulation attributed to truncating mtDNA**

937 **variants.** (Left) Heatmap shows directional significance of dysregulation of a given geneset in  
 938 tumors with truncating variants among the given cancer type;  $-\log_{10}(Q\text{-value}) > 2$  indicates  
 939 significant up-regulation,  $< -2$  indicates significant down-regulation. (Right) Histogram of wild-  
 940 type samples and samples with truncating variants used to calculate differentially-expressed  
 941 genes and dysregulated genesets.

942

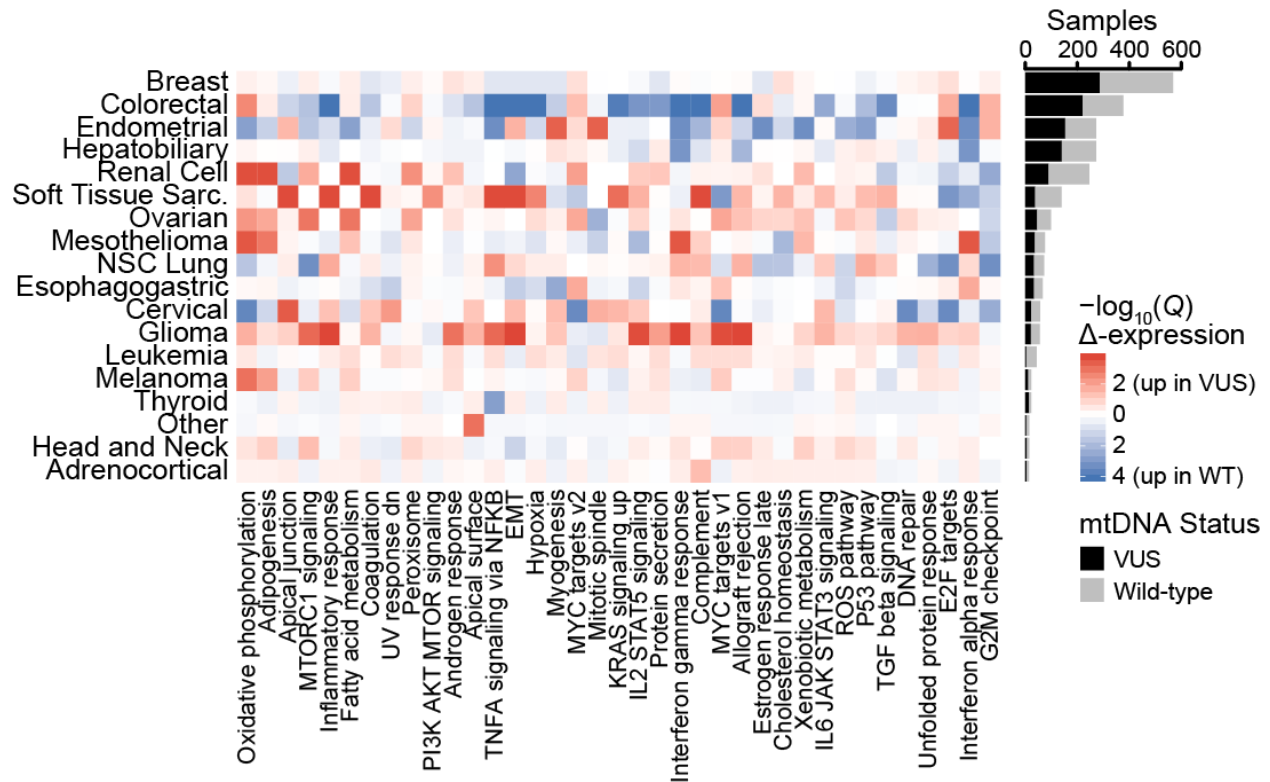

943

944 **Supplementary Fig. 4c: Transcriptional dysregulation attributed to mtDNA VUSs.**

945 Heatmap, differentially expressed mSigDB Hallmarks genesets between tumors with any  
 946 somatic VUSs or wild-type mtDNA. Genesets ordered from most up-regulated across cancer  
 947 types to most down-regulated. Barplot, number of cases with VUSs or wild-type mtDNA.

948

949

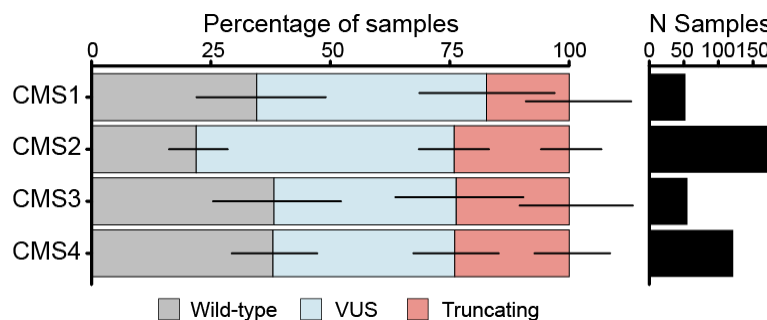

950

951 **Supplementary Fig. 4d: Difference in mtDNA mutation status between colorectal cancer**

952 **consensus molecular subtypes.** Left, the proportion of samples with wild-type mtDNA (*i.e.* no  
 953 somatic mutations), VUS (any non-truncating) or truncating variants among colorectal tumors  
 954 with each consensus molecular subtype (CMS) is shown. Right, histogram of the number of  
 955 well-covered colorectal tumors. There was a statistically significant difference in mtDNA

956 mutation status between different CMS classifications ( $P=0.03$ , Chi-squared test,  $n=415$   
957 samples total).

958  
959

## 960 **Bibliography**

- 961 1. Rheinbay, E. *et al.* Analyses of non-coding somatic drivers in 2,658 cancer whole genomes.  
962 *Nature* **578**, 102–111 (2020).
- 963 2. Ju, Y. S. *et al.* Origins and functional consequences of somatic mitochondrial DNA  
964 mutations in human cancer. *elife* **3**, (2014).
- 965 3. Yuan, Y. *et al.* Comprehensive molecular characterization of mitochondrial genomes in  
966 human cancers. *Nat. Genet.* **52**, 342–352 (2020).
- 967 4. Stewart, J. B. *et al.* Simultaneous DNA and RNA Mapping of Somatic Mitochondrial  
968 Mutations across Diverse Human Cancers. *PLoS Genet.* **11**, e1005333 (2015).
- 969 5. Grandhi, S. *et al.* Heteroplasmic shifts in tumor mitochondrial genomes reveal tissue-  
970 specific signals of relaxed and positive selection. *Hum. Mol. Genet.* **26**, 2912–2922 (2017).
- 971 6. Hopkins, J. F. *et al.* Mitochondrial mutations drive prostate cancer aggression. *Nat.*  
972 *Commun.* **8**, 656 (2017).
- 973 7. To, T.-L. *et al.* A Compendium of Genetic Modifiers of Mitochondrial Dysfunction Reveals  
974 Intra-organelle Buffering. *Cell* **179**, 1222-1238.e17 (2019).
- 975 8. Birsoy, K. *et al.* An essential role of the mitochondrial electron transport chain in cell  
976 proliferation is to enable aspartate synthesis. *Cell* **162**, 540–551 (2015).
- 977 9. Samuels, D. C. *et al.* Finding the lost treasures in exome sequencing data. *Trends Genet.*  
978 **29**, 593–599 (2013).
- 979 10. Cibulskis, K. *et al.* Sensitive detection of somatic point mutations in impure and  
980 heterogeneous cancer samples. *Nat. Biotechnol.* **31**, 213–219 (2013).
- 981 11. Li, H. *et al.* The Sequence Alignment/Map format and SAMtools. *Bioinformatics* **25**, 2078–

- 982           2079 (2009).
- 983   12. Collura, R. V., Auerbach, M. R. & Stewart, C. B. A quick, direct method that can  
984       differentiate expressed mitochondrial genes from their nuclear pseudogenes. *Curr. Biol.* **6**,  
985       1337–1339 (1996).
- 986   13. Cheng, D. T. *et al.* Memorial Sloan Kettering-Integrated Mutation Profiling of Actionable  
987       Cancer Targets (MSK-IMPACT): A Hybridization Capture-Based Next-Generation  
988       Sequencing Clinical Assay for Solid Tumor Molecular Oncology. *J. Mol. Diagn.* **17**, 251–264  
989       (2015).
- 990   14. Bolze, A. *et al.* Selective constraints and pathogenicity of mitochondrial DNA variants  
991       inferred from a novel database of 196,554 unrelated individuals. *BioRxiv* (2019).  
992       doi:10.1101/798264
- 993   15. Chang, M. T. *et al.* Identifying recurrent mutations in cancer reveals widespread lineage  
994       diversity and mutational specificity. *Nat. Biotechnol.* **34**, 155–163 (2016).
- 995   16. Chang, M. T. *et al.* Accelerating discovery of functional mutant alleles in cancer. *Cancer*  
996       *Discov.* **8**, 174–183 (2018).
- 997   17. Gopal, R. K. *et al.* Early loss of mitochondrial complex I and rewiring of glutathione  
998       metabolism in renal oncocytoma. *Proc Natl Acad Sci USA* **115**, E6283–E6290 (2018).
- 999   18. Triska, P. *et al.* Landscape of germline and somatic mitochondrial DNA mutations in  
1000       pediatric malignancies. *Cancer Res.* **79**, 1318–1330 (2019).
- 1001   19. Alston, C. L. *et al.* A novel mitochondrial MTND5 frameshift mutation causing isolated  
1002       complex I deficiency, renal failure and myopathy. *Neuromuscul. Disord.* **20**, 131–135  
1003       (2010).
- 1004   20. Castellana, S. *et al.* High-confidence assessment of functional impact of human  
1005       mitochondrial non-synonymous genome variations by APOGEE. *PLoS Comput. Biol.* **13**,  
1006       e1005628 (2017).
- 1007   21. Martínez-Reyes, I. *et al.* Mitochondrial ubiquinol oxidation is necessary for tumour growth.

- 1008 *Nature* (2020). doi:10.1038/s41586-020-2475-6
- 1009 22. El-Hattab, A. W., Adesina, A. M., Jones, J. & Scaglia, F. MELAS syndrome: Clinical  
1010 manifestations, pathogenesis, and treatment options. *Mol. Genet. Metab.* **116**, 4–12 (2015).
- 1011 23. Gorman, G. S. *et al.* Prevalence of nuclear and mitochondrial DNA mutations related to  
1012 adult mitochondrial disease. *Ann. Neurol.* **77**, 753–759 (2015).
- 1013 24. Gopal, R. K. *et al.* Widespread chromosomal losses and mitochondrial DNA alterations as  
1014 genetic drivers in hürthle cell carcinoma. *Cancer Cell* **34**, 242-255.e5 (2018).
- 1015 25. Spagnolo, M. *et al.* A new mutation in the mitochondrial tRNA(Ala) gene in a patient with  
1016 ophthalmoplegia and dysphagia. *Neuromuscul. Disord.* **11**, 481–484 (2001).
- 1017 26. Miller, M. L. *et al.* Pan-Cancer Analysis of Mutation Hotspots in Protein Domains. *Cell Syst.*  
1018 **1**, 197–209 (2015).
- 1019 27. Gao, J. *et al.* 3D clusters of somatic mutations in cancer reveal numerous rare mutations as  
1020 functional targets. *Genome Med.* **9**, 4 (2017).
- 1021 28. Horváth, R., Reilmann, R., Holinski-Feder, E., Ringelstein, E. B. & Klopstock, T. The role of  
1022 complex I genes in MELAS: a novel heteroplasmic mutation 3380G>A in ND1 of mtDNA.  
1023 *Neuromuscul. Disord.* **18**, 553–556 (2008).
- 1024 29. Agip, A.-N. A. *et al.* Cryo-EM structures of complex I from mouse heart mitochondria in two  
1025 biochemically defined states. *Nat. Struct. Mol. Biol.* **25**, 548–556 (2018).
- 1026 30. Joshi, S. *et al.* The genomic landscape of renal oncocytoma identifies a metabolic barrier to  
1027 tumorigenesis. *Cell Rep.* **13**, 1895–1908 (2015).
- 1028 31. Ganly, I. *et al.* Integrated genomic analysis of hürthle cell cancer reveals oncogenic drivers,  
1029 recurrent mitochondrial mutations, and unique chromosomal landscapes. *Cancer Cell* **34**,  
1030 256-270.e5 (2018).
- 1031 32. Guinney, J. *et al.* The consensus molecular subtypes of colorectal cancer. *Nat. Med.* **21**,  
1032 1350–1356 (2015).
- 1033 33. Yaeger, R. *et al.* Clinical sequencing defines the genomic landscape of metastatic



- 1034 colorectal cancer. *Cancer Cell* **33**, 125-136.e3 (2018).
- 1035 34. Priolo, C. *et al.* Impairment of gamma-glutamyl transferase 1 activity in the metabolic  
1036 pathogenesis of chromophobe renal cell carcinoma. *Proc Natl Acad Sci USA* **115**, E6274–  
1037 E6282 (2018).
- 1038 35. Cancer Genome Atlas Research Network *et al.* The Cancer Genome Atlas Pan-Cancer  
1039 analysis project. *Nat. Genet.* **45**, 1113–1120 (2013).
- 1040 36. McKenna, A. *et al.* The Genome Analysis Toolkit: a MapReduce framework for analyzing  
1041 next-generation DNA sequencing data. *Genome Res.* **20**, 1297–1303 (2010).
- 1042 37. Li, H. A statistical framework for SNP calling, mutation discovery, association mapping and  
1043 population genetical parameter estimation from sequencing data. *Bioinformatics* **27**, 2987–  
1044 2993 (2011).
- 1045 38. Chakravarty, D. *et al.* Oncokb: A precision oncology knowledge base. *JCO Precis. Oncol.*  
1046 **2017**, (2017).
- 1047 39. Sonney, S. *et al.* Predicting the pathogenicity of novel variants in mitochondrial tRNA with  
1048 MitoTIP. *PLoS Comput. Biol.* **13**, e1005867 (2017).
- 1049 40. Love, M. I., Huber, W. & Anders, S. Moderated estimation of fold change and dispersion  
1050 for RNA-seq data with DESeq2. *Genome Biol.* **15**, 550 (2014).
- 1051 41. Zhu, A., Ibrahim, J. G. & Love, M. I. Heavy-tailed prior distributions for sequence count  
1052 data: removing the noise and preserving large differences. *Bioinformatics* **35**, 2084–2092  
1053 (2019).
- 1054 42. Benjamini, Y. *et al.* Controlling the False Discovery Rate : A Practical and Powerful  
1055 Approach to Multiple Testing Author ( s ): Yoav Benjamini and Yosef Hochberg Source :  
1056 Journal of the Royal Statistical Society . Series B ( Methodological ), Vol . 57 , No . 1  
1057 Published by : *J R Statist Soc B* **57**, 289–300 (1995).
- 1058 43. Liberzon, A. *et al.* The Molecular Signatures Database (MSigDB) hallmark gene set  
1059 collection. *Cell Syst.* **1**, 417–425 (2015).

- 1060 44. Sergushichev, A. An algorithm for fast preranked gene set enrichment analysis using  
1061 cumulative statistic calculation. *BioRxiv* (2016). doi:10.1101/060012
- 1062 45. Liu, Y. *et al.* Comparative molecular analysis of gastrointestinal adenocarcinomas. *Cancer*  
1063 *Cell* **33**, 721-735.e8 (2018).
- 1064 46. Ellrott, K. *et al.* Scalable open science approach for mutation calling of tumor exomes using  
1065 multiple genomic pipelines. *Cell Syst.* **6**, 271-281.e7 (2018).
- 1066 47. Pettersen, E. F. *et al.* UCSF Chimera—a visualization system for exploratory research and  
1067 analysis. *J. Comput. Chem.* **25**, 1605–1612 (2004).
- 1068 48. Jurcik, A. *et al.* CAVER Analyst 2.0: analysis and visualization of channels and tunnels in  
1069 protein structures and molecular dynamics trajectories. *Bioinformatics* **34**, 3586–3588  
1070 (2018).
- 1071 49. Zhu, J., Vinothkumar, K. R. & Hirst, J. Structure of mammalian respiratory complex I.  
1072 *Nature* **536**, 354–358 (2016).
- 1073 50. Baker, N. A., Sept, D., Joseph, S., Holst, M. J. & McCammon, J. A. Electrostatics of  
1074 nanosystems: application to microtubules and the ribosome. *Proc Natl Acad Sci USA* **98**,  
1075 10037–10041 (2001).
- 1076 51. Dolinsky, T. J., Nielsen, J. E., McCammon, J. A. & Baker, N. A. PDB2PQR: an automated  
1077 pipeline for the setup of Poisson-Boltzmann electrostatics calculations. *Nucleic Acids Res.*  
1078 **32**, W665-7 (2004).
